1 **Human engineered skeletal muscle of hypaxial origin from pluripotent stem cells with**  
2 **advanced function and regenerative capacity**

3 Mina Shahriyari<sup>1,2</sup>, Md Rezaul Islam<sup>3</sup>, M. Sadman Sakib<sup>3</sup>, Anastasia Rika<sup>1,2</sup>, Dennis Krüger<sup>3</sup>,  
4 Lalit Kaurani<sup>3</sup>, Harithaa Anandakumar<sup>1,2</sup>, Orr Shomroni<sup>4</sup>, Matthias Schmidt<sup>5</sup>, Gabriela  
5 Salinas<sup>4</sup>, Andreas Unger<sup>6</sup>, Wolfgang A. Linke<sup>6</sup>, Jana Zschüntzsch<sup>5</sup>, Jens Schmidt<sup>5,7</sup>, André  
6 Fischer<sup>3,8</sup>, Wolfram-Hubertus Zimmermann<sup>1,2,3,8,9\*</sup>, Malte Tiburcy<sup>1,2\*</sup>

7 <sup>1</sup> Institute of Pharmacology and Toxicology, University Medical Center Göttingen, Göttingen,  
8 Germany.

9 <sup>2</sup> DZHK (German Center for Cardiovascular Research), partner site Göttingen, Germany

10 <sup>3</sup> Department for Epigenetics and Systems Medicine in Neurodegenerative Diseases, German  
11 Center for Neurodegenerative Diseases (DZNE) Göttingen, Göttingen, Germany

12 <sup>4</sup> NGS Integrative Genomics Core Unit, Institute of Human Genetics, University Medical  
13 Center Göttingen, Göttingen, Germany

14 <sup>5</sup> Department of Neurology, University Medical Center Göttingen, Göttingen, Germany

15 <sup>6</sup> Institute of Physiology II, University of Münster, D-48149 Münster, Germany

16 <sup>7</sup> Department of Neurology and Pain Treatment, University Hospital of the Medical School  
17 Brandenburg, Immanuel Klinik Rüdersdorf, Rüdersdorf bei Berlin, Germany

18 <sup>8</sup> Cluster of Excellence "Multiscale Bioimaging: from Molecular Machines to Networks of  
19 Excitable Cells" (MBExC), University of Göttingen, Germany;

20 <sup>9</sup> Fraunhofer Institute for Translational Medicine and Pharmacology (ITMP), Göttingen,  
21 Germany

22

23 \*Corresponding authors:

|                                             |                                          |
|---------------------------------------------|------------------------------------------|
| 24 Malte Tiburcy, MD                        | Wolfram-Hubertus Zimmermann, MD          |
| 25 Institute of Pharmacology and Toxicology | Institute of Pharmacology and Toxicology |
| 26 University Medical Center Göttingen      | University Medical Center Göttingen      |
| 27 Georg-August-University                  | Georg-August-University                  |
| 28 Robert-Koch-Str. 40                      | Robert-Koch-Str. 40                      |
| 29 37075 Göttingen                          | 37075 Göttingen                          |
| 30 Germany                                  | Germany                                  |
| 31 Tel: +49-551-39-20729                    | Tel: +49-551-39-65787                    |
| 32 Fax: +49-551-39-5699                     | Fax: +49-551-39-5699                     |
| 33 m.tiburcy@med.uni-goettingen.de          | w.zimmermann@med.uni-goettingen.de       |

34

35

36

37 **Summary**

38 Human pluripotent stem cell derived muscle models show great potential for translational  
39 research. Here, we describe developmentally inspired methods for derivation of skeletal  
40 muscle cells and their utility in three-dimensional skeletal muscle organoid formation as well  
41 as skeletal muscle tissue engineering. Key steps include the directed differentiation of human  
42 pluripotent stem cells to embryonic muscle progenitors of hypaxial origin followed by  
43 primary and secondary fetal myogenesis into hypaxial muscle with development of a satellite  
44 cell pool and evidence for innervation *in vitro*. Skeletal muscle organoids faithfully  
45 recapitulate all steps of embryonic myogenesis in 3D. Tissue engineered muscle exhibits  
46 organotypic maturation and function, advanced by thyroid hormone. Regenerative  
47 competence was demonstrated in a cardiotoxin injury model with evidence of satellite cell  
48 activation as underlying mechanism. Collectively, we introduce a hypaxial muscle model with  
49 canonical properties of *bona fide* skeletal muscle *in vivo* to study muscle development,  
50 maturation, disease, and repair.

51

52

53

54

55 **Keywords**

56 Skeletal muscle organoid, tissue engineering, limb muscle, hypaxial dermomyotome, satellite  
57 cells, regeneration, spinal neurons, motor end plate

58

59

60

## 61 **Introduction**

62 Pluripotent stem cell (PSC)-derived organotypic cultures with structural and functional  
63 properties of native human tissue are increasingly utilized for disease modeling and drug  
64 screening applications (Tachibana, 2018). Organotypic skeletal muscle cultures are highly  
65 sought after, because of the central role of skeletal muscle in disease (e.g., myopathies) and  
66 drug effects (e.g., insulin). Early studies have demonstrated that it only requires MyoD  
67 overexpression in fibroblasts cells to recreate skeletal muscle cells (Davis et al., 1987).  
68 Alternatively, muscle stem cells can be isolated from muscle biopsies, but rapidly lose their  
69 stem cell properties with expansion often requiring immortalization to provide sufficient  
70 numbers of consistent cell quality (Mamchaoui et al., 2011; Striedinger et al., 2021). In those  
71 muscle models developmental information on muscle origin is not existent or lost. Deriving  
72 skeletal muscle cells from human PSC via directed differentiation closely recapitulating  
73 embryonic myogenesis may overcome these shortcomings.

74 The derivation of skeletal muscle cells from PSC has been demonstrated previously either by  
75 transfection or transduction of myogenic transgenes (Albini et al., 2013; Darabi et al., 2012;  
76 Goudenege et al., 2012; Kim et al., 2017; Rao et al., 2018; Tedesco et al., 2012; Young et al.,  
77 2016) or directed, transgene-free differentiation under controlled growth factors or small  
78 molecules stimulation (Borchin et al., 2013; Caron et al., 2016; Chal et al., 2016; Chal et al.,  
79 2015; Choi et al., 2016; Shelton et al., 2016; Xi et al., 2017). Recently, more advanced  
80 skeletal muscle organoids have been introduced that recapitulate characteristic steps of  
81 embryonic neuromuscular co-development (Faustino Martins et al., 2020; Mazaleyrat et al.,  
82 2020).

83 The embryonic development of skeletal muscle is a complex process with intricate interplay  
84 of decisive transcriptional programs (Buckingham, 2017). Following the specification of

85 presomitic (paraxial) mesoderm from epiblast/neuromesodermal progenitors (NMPs), trunk  
86 and limb muscle derives from developing somites. The myogenic structure to form first in the  
87 developing somite is the dermomyotome, which can be anatomically divided into dorsomedial  
88 (epaxial) and ventrolateral (hypaxial) compartments giving rise to skeletal muscle of back and  
89 trunk/limb, respectively. Hypaxial PAX3+ dermomyotomal progenitors cells, characterized  
90 by LBX1 and SIM1 expression, migrate into the limb bud to form limb muscle (Buckingham  
91 and Mayeuf, 2012; Coumailleau and Duprez, 2009). Further myogenic differentiation is then  
92 proceeded with embryonic primary and fetal secondary myofiber formation (Biressi et al.,  
93 2007). Recent work has contributed significantly in dissecting transcriptome profiles and cell  
94 composition in developing human limb muscle (Xi et al., 2017; Xi et al., 2020).

95 Several studies have applied tissue engineering methods to generate skeletal muscle from  
96 human pluripotent stem cell-derived cells *in vitro* (Maffioletti et al., 2018; Rao et al., 2018;  
97 Xu et al., 2019) collectively suggesting a potential of 3D skeletal muscle for disease modeling  
98 and regenerative medicine. However, the functional output of *in vitro* muscle is still far from  
99 postnatal muscle even though improvements have been demonstrated using a specific cell  
100 culture supplement (Xu et al., 2019). For the only transgene-free model published so far,  
101 muscle function was not reported (Maffioletti et al., 2018). In a previous study using rat  
102 primary myocytes, our group demonstrated that the application of collagen/Matrigel®  
103 hydrogels in combination with isometric loading generates Engineered Skeletal Muscle  
104 (ESM) with physiological function and a regenerative satellite cell niche *in vitro* (Tiburcy et  
105 al, 2019).

106 Here, we report a transgene-free and completely serum-free human muscle protocol that  
107 closely follows developmental, tissue-specific paradigms to derive hypaxial muscle of limb  
108 and trunk which shows regenerative as well as innervation capacity. Human ESM respond to  
109 developmentally relevant cues, such as triiodothyronine, with an advanced maturation,

110 demonstrating physiological growth potential and establishing the groundwork for further  
111 optimization of *in vitro* engineered human skeletal muscle for applications in developmental  
112 studies, disease modelling, and muscle regeneration research.

## 113 **Results**

### 114 **Directed differentiation of hypaxial skeletal myocytes from human pluripotent stem cells**

115 To robustly generate human skeletal muscle, we followed several developmental paradigms,  
116 which were first optimized in monolayer cultures by directed skeletal muscle differentiation  
117 (final optimized protocol in **Figure 1A**). We reasoned that a modification of BMP (inhibition)  
118 and Wnt (activation) signaling pathways, previously identified as crucial for myogenesis  
119 (Chal et al., 2016; Shelton et al., 2016; Shelton et al., 2014), would be a good starting point.  
120 Whereas Wnt activation by CHIR99021 (10  $\mu\text{mol/L}$ ; GSK-3 $\alpha/\beta$  inhibition with an  $\text{IC}_{50} \leq 10$   
121  $\text{nmol/L}$ ) serves as a more generic mesoderm induction measure (Lian et al., 2012; Mendjan et  
122 al., 2014; Tiburcy et al., 2017), it is the parallel inhibition of BMP with LDN 193189 (0.5  
123  $\mu\text{mol/L}$ ; ALK2 and ALK3 inhibition with an  $\text{IC}_{50} \leq 30$   $\text{nmol/L}$ ), which is instrumental in  
124 specifying *MSGN1*<sup>+</sup> paraxial mesoderm (Miura et al., 2006) versus *MESPI*<sup>+</sup> lateral plate  
125 mesoderm (**Figure 1B**). Following paraxial mesoderm induction, Notch 1 signaling was  
126 blocked with DAPT (10  $\mu\text{mol/L}$ ;  $\gamma$ -secretase inhibition;) in the presence of FGF2 and HGF to  
127 support somitogenesis and inhibit Notch 1 dependent epaxial dermomyotomal progenitors  
128 (Bladt et al., 1995; Mayeuf-Louchart et al., 2014; Rios et al., 2011). The resulting formation  
129 of hypaxial progenitors, which give rise to limb and trunk muscle, was confirmed by the  
130 expression of *PAX3*, *SIMI*, *LBX1*, and lack of *EN1* (**Figure 1C**). Considering that continuous  
131 Notch inhibition prevents differentiation of *PAX3*<sup>+</sup> cells to early myoblasts, DAPT was then  
132 discontinued from day 13 of differentiation to allow for the expression of myogenic  
133 regulatory factors (MRFs) such as *PAX7*, *MYOD1* and *MYOG* as well as sarcomeric  
134 transcripts such as *ACTN2* (**Figure 1D**; (Choi et al., 2016; Hirsinger et al., 2001)).

135 Immunostaining confirmed the specific stages of skeletal muscle differentiation with timed  
136 expression of characteristic myogenic regulatory factors (PAX3, PAX7, MYOD1, MYOG) on  
137 protein level. In addition, the sarcomeric actinin (ACTN2) staining indicated highly efficient  
138 skeletal myocyte generation with this protocol (**Figure 1E**).

139

#### 140 **Myocyte differentiation closely follows embryonic skeletal muscle development *in vivo***

141 To obtain more insight into the global developmental patterns of skeletal muscle  
142 differentiation *in vitro* we subjected the RNAseq data obtained at selected time points (**Figure**  
143 **2A**) to bioinformatic analyses. Unbiased clustering clearly separated the distinct time points  
144 into mesoderm induction (days 0, 1 and 4), myogenic specification (days 8 and 13), early  
145 (days 22 and 29) and advanced (day 60) myogenic maturation (**Figure 2B**). Further clustering  
146 the genes by weighted co-expression analysis identified 22 gene clusters with remarkable  
147 overlap to the biological processes of skeletal muscle differentiation characterized by the  
148 expression of developmental signature genes (**Figure 2C,D, Supplementary Table 1**).  
149 Coinciding with the loss of pluripotency, we observed an increase in primitive streak  
150 transcripts (*MIXL*). Expression of *TBX6* (cluster “brown”) and the segmentation gene *HES7*  
151 (cluster “red”) indicated robust paraxial mesoderm formation and patterning, which was  
152 followed by dermomyotomal progenitor transcript *FOXC2* (cluster “turquoise”; **Figure 2D**).  
153 By day 8 of differentiation robust *PAX3*, *TWIST1* and *SIMI* expression indicated the  
154 formation of the hypaxial dermomyotomal cells (cluster “salmon”) and migrating limb  
155 progenitors (*SIX1*, *MET*, *MEOX2*, cluster “black”). This was followed by an increase in genes  
156 indicative of myoblast generation and fusion (*MYMX*, *NGFR*, *ERBB3*) and an increase of  
157 more mature transcripts such as *MYF6*, *TTN*, *MYL3* (cluster “blue”).

158 We next asked if the identified gene clusters overlap with developmentally regulated genes of  
159 human embryonic muscle. We made use of a published data set (GSE908776) containing the

160 transcriptomes of embryonic presomitic mesoderm (PSM), nascent somite (SM), and  
161 developed somite (SM dev) from human embryonic tissue (Xi et al., 2017). Interestingly,  
162 several of the bioinformatically identified clusters from skeletal myogenesis *in vitro* showed  
163 significant overlap with the data obtained from embryonic development *in vivo* (**Figure 2E**).  
164 Note that the very early developmental gene clusters (i.e., paraxial mesoderm stage and  
165 earlier) are not represented in the embryo data set and therefore cannot overlap (labelled as  
166 not applicable, n.a.).

167 We then utilized the co-expression analysis to dissect processes coinciding with particular  
168 stages of muscle development. We focused on the “blue” cluster as this showed the highest  
169 overlap with the developed somite *in vivo* (**Figure 2E**) and may therefore contain transcripts  
170 that support muscle differentiation and maturation. Interestingly, cluster “blue” was highly  
171 enriched in signaling transcripts (**Figure 2F**). Among them we identified several signaling  
172 pathways that have been associated with muscle maturation such as NRG1 (Selvaraj et al.,  
173 2019), IGF1/VEGF (Xu et al., 2019), and thyroid hormone (Larsson et al., 1994; Schiaffino et  
174 al., 1988; Simonides and van Hardeveld, 2008) indicating that our protocol emulates central  
175 mechanisms of muscle development *in vivo*.

176

### 177 **Myocyte and non-myocyte populations of embryonic myogenesis *in vitro***

178 As skeletal muscle differentiation from PSC may yield heterogenous cell populations (Xi et  
179 al., 2020) we aimed to characterize the cell composition on single cell level. *Bona-fide*  
180 skeletal myogenic markers were quantified by immunostaining (**Figure 3A**). Differentiated  
181 cultures at day 22 contained a myogenic cell population consisting of 43±4% PAX7+, 52±2%  
182 MYOD1+, and 49±4% MYOGENIN+ (n=9-13 differentiations) cells (**Figure 3B**). Per input  
183 PSC we obtained 61±5 (n=10) differentiated skeletal myogenic cells. Flow cytometry  
184 confirmed the quantification of immunostaining data and showed comparable efficiency for 1

185 human embryonic stem cell (HESC) and 4 different induced pluripotent stem cell (iPSC) lines  
186 supporting the robustness and reproducibility of the protocol (**Supplementary Figure 1**). We  
187 then investigated day 22 cultures by single nuclei sequencing to gain further insight into the  
188 cell composition. 8 cell populations were separated by unsupervised clustering (**Figure 3C**).  
189 To identify myogenic cells a panel of genes (muscle genes, **Supplementary Table 2**) was  
190 extracted. This panel identified 3 myogenic cell populations accounting for 45% of the total  
191 cell population (**Figure 3D, E**). Non-muscle cells were identified as mesenchymal progenitor  
192 cells (41%), neuroectodermal progenitor cells (9%), and neurons (5%; **Figure 3E**). We did  
193 not identify a specific Schwann cell (*CHD19+*), (pre-)chondrocyte (*SHOX2+*), or tenogenic  
194 cell (*TNMD+*) cell population in contrast to other protocols (Xi et al., 2020). The myogenic  
195 cells mainly consisted of *PAX7+* progenitors and relatively few matured *MYH3+* myoblasts  
196 in line with the early time point of analysis. The neuronal population transcript signatures  
197 suggested the presence of bona fide neurons (*MAPT+*) and neuroectodermal progenitor cells  
198 (*SOX2+/PAX3+/PAX7+*). The mesenchymal cells showed an expression pattern consistent  
199 with limb fibro-adipogenic progenitor (FAP) cells with combined expression of *PDGFRA*,  
200 *MEOX2* and brown fat transcription factor *EBF2* (Rajakumari et al., 2013; Reijntjes et al.,  
201 2007; Uezumi et al., 2010; Xi et al., 2020). These data indicate that the differentiation  
202 protocol not only recapitulates the embryonic development of muscle cells but that of  
203 essential non-muscle cells.

204

## 205 **Directing iPSC to force-generating skeletal muscle organoids**

206 As 2D cultures of skeletal myocytes do not develop the spatial and structural organization of  
207 skeletal muscle *in vivo* (Afshar Bakooshli et al., 2019) we next asked if the muscle generation  
208 process could be fully recapitulated in a 3D environment. To test this, we embedded  
209 undifferentiated iPSC in a collagen/Matrigel hydrogel [adapted from our previous skeletal



210 muscle engineering work in rodents (Tiburcy et al. 2019)] and subjected them to the for the  
211 human PSC established differentiation protocol (**Figure 1A**) to obtain skeletal muscle  
212 organoids (SMOs; **Figure 4A**). 3D SMO development was supported by the casting of the  
213 iPSC/matrix mixture in circular molds. SMO rings formed within 24 h after casting, Transfer  
214 of SMO onto holders of defined distance on culture day 22 supported further maturation  
215 under defined mechanical strain (**Figure 4A**). We next asked if the temporal sequence of  
216 muscle cell development was comparable to 2D differentiation. RNA expression analyses  
217 showed a decrease in pluripotency genes (*POU5F1*), increase of paraxial mesoderm  
218 (*MSGN1*), dermomyotome (*PAX3*), and muscle progenitors expressing *PAX7*, *MYOD1*, and  
219 *MYOG* similar as in 2D cultures (**Figure 4B**). Importantly, we observed an identical pattern of  
220 hypaxial progenitor specification expressing *SIX1* and *SIMI* with only low levels of *EN1*. In  
221 addition, robust increases in *NFIX* and *ENO3* expression suggested secondary myogenesis in  
222 maturing SMOs between day 22 and 52 (**Figure 4C**). Compatible with the expression data  
223 significant amounts of differentiated, multinucleated muscle fibers were identified by  
224 immunostaining. F-actin and dystrophin-associated glycoprotein,  $\beta$ -dystroglycan staining on  
225 SMO cross sections indicated that  $48\pm 6\%$  (n=3) of the total cross sectional area was  
226 populated with muscle cells (**Figure 4D**). Muscle cells were aligned and cross striated  
227 indicating a well-developed sarcomeric structure (**Figure 4E**). In line with the transcriptome  
228 data of single cell nuclei in monolayer cultures, SMOs also contained neurofilament positive  
229 cells co-labeled for the motoneuron marker SMI32 (**Figure 4E**), suggesting innervation in  
230 line with recently reported data (Faustino Martins et al., 2020). Maturing SMOs demonstrated  
231 spontaneous contractions (**Video 1**) and robust force generation at day 50. At 1 Hz electrical  
232 stimulation SMOs generated single twitches whereas at higher frequencies tetanic  
233 contractions were observed which were maximal at 100 Hz ( $1.1\pm 0.1$  mN, n=9; **Figure 4F,G**).  
234 In summary, we demonstrate the generation of functional muscle of hypaxial origin directly  
235 from human PSC in a novel 3D organoid approach.

236

### 237 **Engineering human muscle with advanced muscle function**

238 As an alternative and more controlled tissue engineered approach to generate human skeletal  
239 muscle, we tested whether already differentiated PSC-derived skeletal myocyte populations  
240 obtained from the 2D directed differentiation can be assembled into engineered skeletal  
241 muscle (PSC ESM), following a protocol developed by our group for heart muscle  
242 engineering (Tiburcy et al. 2017) and more recently adapted to skeletal muscle engineering in  
243 a rodent model (Tiburcy et al. 2019). In contrast to the SMO approach, input cellularity in  
244 ESM can be optimally controlled. Day 22 myocytes (identified as optimal time point based on  
245 palpable expression of MRFs and ACTN2, **Figure 1E**) were dissociated and allowed to self-  
246 organize in the same collagen/Matrigel mixture as used for SMO generation. After formation  
247 of a compact tissue ring (after 4-6 days), ESM were transferred to metal holders for further  
248 maturation similar as described for the SMOs (**Figure 5A**). By 1-2 weeks maturation,  
249 spontaneous contractions were observed in ESM (**Video 2**) that increased in frequency until  
250 week 9 (**Video 3**). By 5 weeks of ESM maturation, compact muscle structure with parallel  
251 arrangement of myofibers could be observed. About  $58\pm 3\%$  ( $n=3$ ) of the cross-sectional area  
252 was populated with muscle cells embedded in a Laminin+ extracellular matrix (**Figure 5B**).  
253 Importantly, proteins of the DAG complex such as  $\beta$ -dystroglycan, were properly localized to  
254 the cell membrane and demonstrated the compact arrangement of matured myofibers (**Figure**  
255 **5C**). Ultrastructural analysis supported these findings showing advanced stages of  
256 myofibrillogenesis. Organized sarcomeres with distinct banding pattern including I- bands, A-  
257 bands, M-lines and Z disks were observed and mitochondria with dense matrix and developed  
258 cristae were found aligned with compact sarcomeres (**Figure 5D**). Average length of  
259 sarcomere in ESM was  $1.8\pm 0.02$   $\mu\text{m}$  ( $n=80$ ). In addition, membranous structures of the triad,

260 composed of a central T-tubule surrounded by two terminal cisternae from the sarcoplasmic  
261 reticulum were identified (Al-Qusairi and Laporte, 2011) (**Figure 5D**).

262 Finally, we were interested if the ESM protocol is in principle suitable to also generate  
263 skeletal muscle from human primary skeletal myocytes (pSkM) isolated from 6 different  
264 patients with no known muscle disease. While force generating tissue was uniformly  
265 generated, we noticed high functional inter-patient variability in pSkM ESM compared to  
266 PSC ESM (**Supplementary Figure 2**).

267 Another obvious difference between pSkM ESM and PSC ESM was the lack of spontaneous  
268 contractions in pSkM ESM. We therefore asked if this may be due to PSC ESM innervation  
269 by neurons. This assumption was based on the evidence of neuronal cells by single cell  
270 sequencing of the input day 22 skeletal myocyte cultures (**Figure 3C-F**) and neuronal  
271 differentiations in SMO (**Figure 4E**), but no evidence of the presence of neurons in pSkM  
272 preparations. To identify neurons in PSC skeletal myocyte preparations, we evaluated bulk  
273 RNA sequencing data of parallel day 60 monolayer cultures and day 60 ESM generated from  
274 the same day 22 cell source. Interestingly, we found a markedly higher abundance of neuronal  
275 transcripts (*ISL1*, *MNX1*, *LHX1*), suggestive for the presence of spinal cord motor neurons, in  
276 day 60 ESM compared to day 60 monolayer cultures (**Supplementary Figure 3A**). High  
277 abundance of *LHX1*, but not *LHX3*, does indeed suggest a motor neuron subpopulation with a  
278 limb muscle expression pattern (Sharma et al., 2000). The expression of mature neuronal and  
279 glial transcripts (*NSG2*, *GFAP*) was also significantly higher in ESM compared to 2D  
280 monolayer cultures at the same time point (day 60), suggesting generally more favorable  
281 conditions for neuronal co-development in ESM (**Supplementary Figure 3A**). We further  
282 confirmed the presence of neuronal cell clusters, by immunostaining for neuron markers TUJ1  
283 and SMI32. Interestingly, SMI32+ neurites seemed to contact  $\alpha$ -bungarotoxin+ motor end  
284 plates on the muscle fibers, suggesting the self-organization of motor-end plate-like structures  
285 in ESM (**Figure 5E**). This was supported by expression of Muscle Associated Receptor

286 Tyrosine Kinase (*MUSK*) which is critical for neuromuscular end plate organization  
287 (DeChiara et al., 1996) as well as acetylcholine choline esterase (*ACHE*) and nicotinic  
288 acetylcholine receptor subunit alpha (*CHRNA1*) (**Supplementary Figure 3B**). We confirmed  
289 the functionality of motor end plates by pharmacological activation of acetylcholine receptors.  
290 The mixed muscarinic-nicotinic acetylcholine receptor agonist carbachol caused a reversible  
291 depolarizing muscle block with almost complete ceasing of electrically stimulated  
292 contractions, indicating well-developed end plate function in ESM (**Supplementary Figure**  
293 **3C,D**).

294

### 295 **Maturation of myosin isoforms in ESM by T3 treatment**

296 To enhance ESM maturation and based on the well documented role of thyroid hormones on  
297 muscle maturation as well as the finding of a high thyroid hormone receptor expression (blue  
298 “maturation cluster”; **Figure 2C**) we hypothesized that triiodo-L-thyronine (T3) addition may  
299 enhance the transition of myosin heavy chain isoform expression towards adult fast myosin  
300 isoforms (Larsson et al. 1994; Schiaffino et al. 1988, 2015; Simonides and van Hardeveld  
301 2008) and increase tetanic force production. To test this hypothesis, we added T3 either  
302 during early maturation (1-5 weeks of ESM culture) or late maturation (5-9 weeks of ESM  
303 culture; **Figure 6A**).

304 T3 treatment did not influence the maximal twitch tension (**Figure 6B**), but clearly shortened  
305 the duration of single twitches of both 5 and 9 week ESM. Accordingly, the speed of  
306 contraction (Time to 90% contraction - T1) of single twitches as well as relaxation (Time to  
307 50% relaxation - T2) at 5 and 9 weeks was significantly increased (**Figure 6C**). In addition,  
308 the rate of force development (RFD) and the rate of force decline in tetanic contractions (100  
309 Hz stimulation frequency) was enhanced in 5 weeks ESM and tended to be faster (p=0.18)  
310 also in 9 weeks ESM (**Figure 6D**).

311 The tetanus threshold (i.e. frequency where single twitches fuse to tetani) is greater in  
312 mammalian adult fast muscle fiber in comparison to slow muscle fibers (Buller and Lewis,  
313 1965). The tetanus threshold of ESM with and without T3 treatment was analyzed by  
314 calculation of a fusion index (**Supplementary Figure 4**) derived from twitch recordings at  
315 increasing stimulation frequencies (**Figure 6B**). We found that the tetanus fusion index was  
316 different in ESM treated with T3 with a significant shift towards higher stimulation  
317 frequencies (50% fusion at  $3.92 \pm 0.24$  Hz vs  $5.44 \pm 0.05$  Hz in control ESM vs. ESM+T3,  
318 respectively,  $n=8$ ; **Supplementary Figure 4**). Collectively, these functional data suggest that  
319 T3 enhances fast muscle properties of ESM.

320 We next asked if the T3 treatment affects the myosin heavy chain (MYH) isoform expression  
321 in ESM. Interestingly, T3 treatment clearly enhanced the abundance of mature fast MYH2  
322 isoform with a reduction of the embryonic MYH3 isoform. The levels of the slow myosin  
323 isoform MYH7 were unchanged (**Figure 6E**). These molecular changes are well in line with  
324 the functional phenotype suggesting that T3 indeed supports maturation of fast skeletal  
325 muscle properties in ESM. The data also demonstrates that ESM respond to physiological  
326 stimuli comparable to skeletal muscle *in vivo*.

327

### 328 **ESM contain satellite cells with regenerative capacity**

329 Even after prolonged *in vitro* culture we found muscle stem cell transcripts in the  
330 differentiated skeletal muscle cultures. In early (day 22) and late cultures (day 60), we found a  
331 similar expression of *PAX7*, but higher expression of satellite cell markers *MYF5* and *BARX2*  
332 (Cornelison and Wold, 1997; Meech et al., 2012) in ESM compared to monolayer culture  
333 suggesting a higher propensity to reconstitute and retain a satellite cell niche in ESM (**Figure**  
334 **7A**). Immunostaining confirmed the presence of Pax7<sup>+</sup> cells,  $63 \pm 4\%$  ( $n=267$  cells counted) of  
335 which were located adjacent to a muscle fiber in ESM. The localization underneath the

336 laminin+ basal lamina was indicative of a satellite cell position. Of note, 75±6% (n=164 cells  
337 counted) of these PAX7+ cells were Ki67-, implicating a quiescent state. In identically aged  
338 2D monolayer cultures only 32±5% (n=105 cells counted) of PAX7+ cells were associated  
339 with muscle fibers (**Figure 7B**). These data suggest that muscle cells in ESM self-organize  
340 into myofibers with adjacent satellite cells and thus recapitulate important cellular  
341 components in an anatomically appropriate position for regenerative muscle.

342 To test if these cells are capable of a muscle regeneration *in vitro*, we applied a cardiotoxin  
343 injury model in ESM [**Figure 7C**; (Tiburcy et al., 2019)]. 2 days after CTX injury ESM did  
344 not generate measurable force indicative of a complete loss of organized muscle fibers. After  
345 a regeneration period of 21 days, a partial, but robust recovery of contractile force (to 57±8%  
346 of initial force, n= 7) was observed (**Figure 7D**). RNA expression data were in line with the  
347 functional data showing an almost complete loss of mature muscle transcript (*TTN*) while  
348 *PAX7* transcript was largely preserved 2 days after CTX injury (**Figure 7E**). Upregulation of  
349 *Ki67* (*MKI67*) and *CDK1* indicated cell cycle activation post injury. Consistent with results in  
350 murine muscle regeneration (Bi et al., 2017; Millay et al., 2014), we observed high expression  
351 of myomixer (*MYMX*) at day+2 coinciding with satellite cell activation. Myomaker (*MYMK*)  
352 expression increased later in the course of regeneration collectively showing that the  
353 regeneration of human muscle *in vitro* follows the regenerative pattern *in vivo*. Importantly,  
354 recovery of contractile force was paralleled by reexpression of *TTN* muscle transcript 21 days  
355 post injury. Immunostaining confirmed the almost complete loss of mature myofibers with  
356 sparing of PAX7+ satellite cells on day+2 after cardiotoxin injury. After 21 days of  
357 regeneration, substantial muscle was re-built (**Figure 7F**). To test if the cell cycle activation  
358 of satellite cells is required for ESM regeneration, we inhibited cell cycle activity by  
359 irradiation with 30 Gy. This completely abolished the regenerative response and formation of  
360 new muscle fibers (**Supplementary Figure 5**). Note, that irradiation of uninjured muscle did

361 not impact contractile force. Those data demonstrate that ESM regeneration depends on  
362 activation of a PAX7+, dividing muscle stem cell.

363

364

## 365 **Discussion**

366 We report a novel model for human skeletal muscle derivation in 2D and 3D organoid (SMO)  
367 cultures as well as for the engineering of skeletal muscle (ESM) with advanced structural and  
368 functional properties. Our data suggest that multicellularity (including neurons and supporting  
369 mesenchyme) as well as three-dimensionality are key for *in vitro* skeletal muscle development  
370 with *in vivo* properties. The re-engineering of a regeneration competent satellite cell niche  
371 appears particularly interesting as it may not only offer a solution for disease modelling and  
372 drug screening, but also for stable culture and amplification of satellite cells for regenerative  
373 applications (as demonstrated previously for the rat model; Tiburcy et al. 2019). The  
374 demonstration of further maturation of the developed limb muscle models under T3  
375 supplementation further demonstrates a screening approach for maturation enhancing factors  
376 *in vitro*.

377 In contrast to MRF overexpression models (Albini et al., 2013; Darabi et al., 2012;  
378 Goudenege et al., 2012; Kim et al., 2017; Rao et al., 2018; Tedesco et al., 2012; Young et al.,  
379 2016), we directed differentiation in 2D-monolayer culture and 3D-organoids using defined  
380 and developmentally inspired growth factors and small molecules. The strength of this  
381 approach is the full control over the developmental origin of resulting muscle. We  
382 concentrated on generating hypaxial muscle as these muscle compartments (limbs, diaphragm  
383 and trunk) are predominantly affected by muscle diseases. Wnt activation (by CHIR99021),  
384 FGF signaling (FGF2), and BMP signaling inhibition (LDN193189) were instrumental in

385 specifying paraxial mesoderm but not lateral plate mesoderm (increase in *MSGNI* but not  
386 *MESPI*). Following the induction of paraxial mesoderm, we demonstrated that maintaining  
387 FGF signaling in the presence Notch inhibition (DAPT) greatly increased the specification  
388 into somatic hypaxial progenitors. The predominant development into limb/trunk muscle was  
389 further supported by increase in transcript of migrating limb progenitors (*MEOX2*, *LBX1*,  
390 *MET*). Interestingly, generation of limb muscle progenitors was associated with *PITX2* and  
391 *MYOD1* expression but low levels of *MYF5* expression. This pattern fits to development of  
392 cells that first activate *MYOD1* expression to form limb muscles, whereas predominance of  
393 *MYF5* expression would indicate differentiation into “epaxial-like” muscles (Cossu et al.,  
394 1996; Kablar et al., 1997). In addition to the myogenic population, a *PDGFRA*<sup>+</sup>, *MEOX2*<sup>+</sup>,  
395 *EBF2*<sup>+</sup> mesenchymal support cell population was identified that is reminiscent of limb  
396 mesenchyme (Reijntjes et al., 2007; Xi et al., 2020). It is conceivable that the mesenchymal  
397 population supports muscle formation also *in vitro*. Finally, we found evidence of co-  
398 developing neurons which expressed SMI32 contacting neuromuscular end plates. This was  
399 associated with expression of *MNX1*, *LHX1*, and *ISL1* but not *LHX3* supporting the  
400 development of motor neuron generation with a limb pattern (Sharma et al., 2000).

401 The co-development of spinal motor neurons has recently been described in PSC-derived  
402 skeletal muscle 3D organoids (Faustino Martins et al., 2020; Mazaleyrat et al., 2020).  
403 Interestingly, the data from our model share several aspects of the development of  
404 neuromuscular junctions by Faustino Martins et al. We observed efficient induction of  
405 neuromesodermal progenitor cells expressing *SOX2*, Brachyury (*T*) and *CDX2* as posterior  
406 axis “determinant” (Faustino Martins et al., 2020). Later cultures show significant expression  
407 of posterior HOXC genes 6,9, and 10 but not anterior axis genes (*FOXG1*, *OTX1*, *HOXB1*,  
408 not shown). Expression of “posterior axis” motor neuron genes *ISL1*, *MNX1* and *LHX1*  
409 increased between day 13 and 22 of differentiation at advanced stages of somitogenesis while



410 expression of *OLIG2* as a marker of ventral spinal cord progenitors was not expressed.  
411 Collectively, we conclude that development of engineered skeletal muscle *in vitro* is  
412 associated with neuronal co-development of cells with high similarity to spinal cord motor  
413 neurons. The formation of neuromuscular junctions would likely increase maturation of ESM  
414 based on knowledge gained from previous studies in human 3D engineered muscle (Afshar  
415 Bakooshli et al., 2019).

416 While the SMO model allows for a simulation of embryonic muscle development and because  
417 of the simple one-step approach, our data demonstrates that more classical tissue engineering  
418 models, such as applied for the generation of ESM, are more likely to achieve higher levels of  
419 organotypic maturation. ESM demonstrated higher cellularity, clear anisotropic structure with  
420 membrane localized Dystrophin-associated protein complexes, advanced ultra-structural  
421 properties (e.g., Z-, I-, A-, H-, M-bands and t-tubulation) and ~2-fold higher tetanic forces  
422 (2.3 vs 1.1 mN tetanic twitch force). The main difference is that the developmentally more  
423 advanced cellular input in ESM can be precisely controlled.

424 Despite the advanced organotypic properties, it is important to point out that the observed  
425 contractile parameters in ESM are not fully representative of adult skeletal muscle (Racca et  
426 al. 2013). For example, myocytes in ESM present with a smaller average muscle cell diameter  
427 (0.2-0.3 fold), a fetal myosin isoform expression pattern (high MYH3 to MYH2 ratio), ~10%  
428 of the maximal contractile force reported for adult muscle, and high number of progenitor  
429 cells (PAX7+). Strategies to enhance physiological hypertrophic growth are needed to further  
430 enhance skeletal muscle properties. Increased MYH2 and reduced MYH3 expression under  
431 exposure to T3 represents first evidence of the propensity of ESM to undergo further  
432 maturation if exposed to a supportive environment. The fully serum-free process we  
433 established here will be advantageous for the testing of additional maturation factors.

434 Finally, the observation of regeneration in ESM after cardiotoxin-induced damage in  
435 dependence of PAX7+ satellite cell function was particularly notable because it demonstrates  
436 that regeneration-competent satellite cells can be developed using the reported protocol. Our  
437 conclusion that the observed PAX7+ in ESM are indeed satellite cells is based on the  
438 following observations: (i) PAX7-positive cells assume a satellite cells position underneath  
439 the basal lamina of muscle fibers; (ii) PAX7-positive cells are quiescent, but can be activated  
440 upon injury; (iii) irradiation blocks the regenerative response without evidence of functional  
441 impact on uninjured, for the most part post-mitotic ESM. The regeneration of engineered  
442 muscle by satellite cell activation is fascinating and has only recently been observed for  
443 human muscle *in vitro* (Fleming et al 2020). This study used primary muscle cells similar to  
444 earlier work in the rat (Juhas et al., 2014; Tiburcy et al., 2019) and a BaCl<sub>2</sub> injury model,  
445 which may partially spare myotubes, leaving the possibility for PAX7+-cell-independent  
446 regeneration. To avoid this limitation, we have carefully titrated cardiotoxin to destroy most if  
447 not all developed myofibers, while sparing only and most of the PAX7+ cells. The following  
448 sequelae of PAX7+ cell activation, proliferation and fusion were completely inhibited by  
449 irradiation, which supports a true regenerative pattern.

450 We conclude that the skeletal muscle differentiation protocols in monolayer culture and in a  
451 novel organoid format (SMO) as well as the demonstration of skeletal muscle tissue  
452 engineering (ESM) as a means to enhance maturation provide novel platforms to study human  
453 hypaxial skeletal muscle development, disease and regeneration in a simple and robust *in*  
454 *vitro* model.

455

## 456 **Acknowledgments**

457 M.T. is supported by the DZHK (German Center for Cardiovascular Research), and the  
458 German Research Foundation (DFG TI 956/1-1; SFB 1002 TP C04). W.H.Z. is supported by

459 the DZHK (German Center for Cardiovascular Research), the German Federal Ministry for  
460 Science and Education (IndiHEART; 161L0250A), the German Research Foundation (DFG  
461 SFB 1002 C04/S01, IRTG 1816, MBExC) and the Fondation Leducq (20CVD04). Part of the  
462 work was supported by the Association Française contre les Myopathies (AFM, project no.  
463 20987) to J.S. We acknowledge A.K. Hell and H.M. Lorenz for providing human skeletal  
464 muscle samples. Generation of the GMP line LiPSC-GR1.1 (also known as TC1133 or  
465 RUCDRi002-A) was supported by the NIH Common Fund Regenerative Medicine Program  
466 and reported in Stem Cell Reports (Baghbaderani et al. 2015). The NIH Common Fund and  
467 the National Center for Advancing Translational Sciences (NCATS) are joint stewards of the  
468 LiPSC-GR1.1 resource. The TC1133 line (Master Cell Bank Lot#: 50-001-21) was acquired  
469 by Repairon GmbH from the National Institute of Neurological Disorders and Stroke  
470 (NINDS) Human Cell and Data Repository (NHCDR) and processed to a GMP working cell  
471 bank (WCB). Post production cells from the WCB were kindly provided from Repairon  
472 GmbH to UMG for research use. Expert technical assistance by Iris Iben is gratefully  
473 acknowledged. J.Z. and J.S. are members of the European reference network for  
474 neuromuscular disorders (ERN EURO-NMD).

475

#### 476 **Author contributions**

477 Conceptualization, M.T., W-H.Z. and M.S.; Methodology, M.T., W-H.Z. and M.S.;  
478 Validation, M.T. and M.S.; Formal Analysis, M.T., M.S., M.R.I., M.S.S., D.K., H.A., O.S.,  
479 M.Schm. and A.U.; Investigation, M.T., M.S., M.R.I., M.S.S., A.R., D.K., H.A., O.S.,  
480 M.Schm. and A.U.; Resources, J.S. and J.Z.; Writing - Original Draft, M.T., M.S., W-H.Z.,  
481 M.R.I., M.S.S., O.S., J.Z., J.S. and A.U.; Writing - Review & Editing, M.T., W-H.Z. and  
482 M.S.; Visualization, M.T., M.S., M.R.I., M.S.S., A.R., D.K., L.K., H.A., O.S. and M.Schm.;

483 Supervision, M.T., W-H.Z., A.F., W-A.L., G.S., J.S. and J.Z.; Funding Acquisition, M.T. and  
484 W-H.Z.

485

486 **Declaration of interests:**

487 The University of Göttingen has filed a patent on skeletal muscle generation listing M.  
488 Shahriyari, W.H. Zimmermann, and M. Tiburcy as inventors (WO 2021/074126A1). W.H.Z.  
489 is founder, shareholder, and advisor of myriamed GmbH and Repairon GmbH. M.T. is  
490 advisor of myriamed GmbH and Repairon GmbH.

491

492 **EXPERIMENTAL PROCEDURES**

493 **Human pluripotent stem cell culture**

494 The following pluripotent stem cell (PSC) lines were used in the study: TC1133 [iPSC1;  
495 (Baghbaderani et al., 2015)], iPSC lines 2, 3, and 4 (Long et al., 2018), and HES2 (WiCell).  
496 The use of HES2 line was approved by the Robert-Koch-Institute (Nr. 3.04.02/0160).  
497 Informed consent and ethical approval by the University Medical Center Göttingen was  
498 obtained for use of human iPSC lines. All lines were routinely tested for pluripotency and  
499 confirmed to be free of mycoplasma (Lonza Mycoalert™ kit). Human PSC lines were  
500 maintained on 1:120 Matrigel™ (BD) in phosphate-buffered saline (Thermo Fisher Scientific)  
501 –coated plates and cultured in StemMACS iPS-Brew XF (Miltenyi Biotec) at 37 °C and 5%  
502 CO<sub>2</sub>. Medium was changed every day and when the culture reached a confluency of 80-90%,  
503 it was rinsed once with PBS 1x (Thermo Fisher Scientific) and incubated in Versene solution  
504 (Thermo Fisher Scientific) for 3-5 min at room temperature. Versene was carefully aspirated  
505 and cells were gently washed off with StemMACS iPS-Brew XF (Miltenyi Biotec) with 5 μM

506 Y27632 (Stemgent). Medium was changed to StemMACS iPS-Brew XF (Miltenyi Biotec)  
507 without Y27632 (Stemgent) after 24 hrs.

508

### 509 **Primary human myoblast culture**

510 Muscle samples (Erector spinae muscle) were taken from patients during spine surgery after  
511 obtaining informed consent and with ethical approval by the University Medical Center  
512 Göttingen. Human muscle cell progenitors (satellite cells) were isolated according to the  
513 following protocol (Schmidt et al., 2008). In short, the muscle piece was minced and washed  
514 in phosphate buffered saline and trypsinized. The fragments were seeded to a 25-cm<sup>2</sup> flask in  
515 skeletal muscle growth medium with supplement mix (PromoCell) and 1% Pen/Strep. After  
516 21 days, myoblasts were labeled with anti-CD56/NCAM (mouse clone Eric-1; Thermo Fisher  
517 Scientific), followed by magnetic bead-labeled secondary antibodies and subsequently  
518 separated by magnets (Dyna/Invitrogen). For further expansion cells were seeded to T175  
519 cell culture flasks in skeletal growth medium, which was replaced every other day.

520

### 521 **Directed differentiation of hPSCs into skeletal myocytes**

522 Human pluripotent stem cells were plated at  $1.3 \times 10^4$  to  $2.1 \times 10^4$  cells/cm<sup>2</sup> on 1:120  
523 Matrigel™ (BD) in phosphate-buffered saline (Thermo Fisher Scientific) –coated plates and  
524 cultured in StemMACS iPS-Brew XF (Miltenyi Biotec) with 5 μM of Y27632 (Stemgent).  
525 After 24 h, when the culture reached a confluency of 30 % (day 0), iPS-Brew XF was  
526 replaced with daily refreshed N2-CLF medium for 4 days. N2-CLF medium consisted  
527 of DMEM (Thermo Fisher Scientific) with 1% Pen/Strep, 1% N-2 Supplement, 1% MEM  
528 non-essential amino acid solution (all Thermo Fisher Scientific), 10 μM CHIR99021  
529 (Stemgent), 0.5 μM LDN193189 (Stemgent) and 10 ng/ml FGF-2 (Peprotech). At this stage it

530 is important to titrate cell density (colonies of ~200  $\mu\text{m}$  diameter) and CHIR concentration (7-  
531 10  $\mu\text{M}$ ) to prevent cell death and to perform medium changes slowly to avoid cell  
532 detachment. At day 4, the medium was exchanged with N2-FD medium every 24 hrs until day  
533 6. N2-FD medium contained DMEM with 1% Pen/Strep, 1% N-2 Supplement, 1% MEM  
534 non-essential amino acid solution (all Thermo Fisher Scientific), 20 ng/ml FGF-2 (Peprotech)  
535 and 10  $\mu\text{M}$  DAPT (Tocris). For day 6 and 7 the medium was replaced with N2-FDH medium  
536 which included DMEM with 1% Pen/Strep, 1% N-2 Supplement 1% MEM non-essential  
537 amino acid solution, 20 ng/ml FGF-2 (Peprotech), 10  $\mu\text{M}$  DAPT (Tocris) and 10 ng/ml HGF  
538 (Peprotech). The medium was switched to N2-DHK medium on day 8, 9, 10 and 11. N2-DHK  
539 medium consisted of DMEM, with 1% Pen/Strep, 1% N-2 Supplement, 1% MEM non-  
540 essential amino acid solution (all Thermo Fisher Scientific), 10  $\mu\text{M}$  DAPT (Tocris), 10 ng/ml  
541 HGF (Peprotech) and 10% knockout serum replacement (Thermo Fisher Scientific). From day  
542 12 to 22, myogenic cells were cultured in expansion medium which was refreshed every  
543 second days. Expansion medium contained DMEM with 1% Pen/Strep, 1% N-2  
544 Supplement, 1% MEM non-essential amino acid solution, 10% knockout serum replacement  
545 (all Thermo Fisher Scientific), and 10 ng/ml HGF (Peprotech). To further differentiate the  
546 cells to myotubes in monolayer culture, day 22 skeletal myocytes were enzymatically  
547 dissociated with TrypLE (Thermo Fisher Scientific) for 5 to 7 minutes at 37 °C and replated  
548 on 1:120 Matrigel™ (BD) in phosphate-buffered saline (Thermo Fisher Scientific)-coated  
549 plates at a density of 60–70,000 cells/cm<sup>2</sup> in expansion medium with 5  $\mu\text{M}$  Y27632  
550 (Stemgent). After 24 hr, the expansion medium was refreshed every other day for one week  
551 and then the medium was replaced with maturation medium. Maturation medium consisted of  
552 DMEM, with 1% Pen/Strep, 1% N-2 Supplement, and 2% B-27 Supplement (all Thermo  
553 Fisher Scientific). Maturation medium was changed every second day for 4 weeks.

554

555 **Cryopreservation of human PSC-derived skeletal myocytes**

556 Human PSC-derived skeletal myocytes were cryopreserved on day 22 of culture. For  
557 enzymatic dissociation the cell culture was rinsed once with PBS 1x (Thermo Fisher  
558 Scientific). TrypLE (Thermo Fisher Scientific) was added to the cells and incubated for 5 to 7  
559 minutes at 37 °C and 5% CO<sub>2</sub>. TrypLE digestion was stopped using expansion medium with 5  
560 μM Y27632 (Stemgent). The cell suspension was triturated very gently with a 10-ml pipette  
561 to break the cell clumps and centrifuged at 100xg, 10 minutes, 21°C. Supernatant was  
562 removed and the pellet was resuspended very gently in freezing medium which contained  
563 cold expansion medium with 5 μM Y27632 (Stemgent) and 10% DMSO (Sigma-Aldrich).  
564 10x10<sup>6</sup> human PSC-derived skeletal myocytes were frozen per cryovial in a MrFrosty™  
565 freezing container (Nalgene) at -80°C overnight and then stored at -150°C.

566

#### 567 **Thawing of human PSC-derived skeletal myocytes**

568 The frozen cryovial was taken out from -150° deep freezer (SANYO) and quickly thawed in a  
569 water bath at 37° for approximately 2 min until a small ball of ice was still visible in the  
570 thawing medium. Using a 2 ml serological pipette, the contents of the cryovial were  
571 transferred to a pre-prepared 15 ml tube containing 9 ml of expansion medium with 5 μM  
572 Y27632 (Stemgent). The cell suspension was centrifuged at 100xg, 10 minutes, 21°C. The  
573 supernatant was removed and the pellet was resuspended very gently in expansion medium  
574 with 5 μM Y27632 (Stemgent) for downstream experiments.

575

#### 576 **Preparation of casting molds and static stretchers**

577 For the generation of the 3D muscle models, poly-dimethylsiloxane (PDMS; SYLGARD™  
578 184 Silicone Elastomer Kit, Dow Corning) circular molds with inner/outer diameter 4/6 mm  
579 and 2.5 mm height were fabricated and allowed to cure overnight at 55°C. Static stretch  
580 devices were made from a Teflon® base and stainless steel holders. The detailed protocol for

581 the preparation of the casting molds and static stretchers has been described previously  
582 (Soong et al., 2012; Tiburcy et al., 2014).

583

#### 584 **Generation of human skeletal muscle organoids (SMOs)**

585 To make skeletal muscle organoids (SMOs) from iPSCs, monolayer cultures were dissociated  
586 with Versene when reaching a confluency of 80-90%. A final 250  $\mu$ l/SMO volume mixture of  
587 i) 0.23 mg acid soluble collagen type 1 (LLC Collagen Solutions), ii) 36  $\mu$ l of concentrated 2x  
588 DMEM (Thermo Fisher Scientific) serum-free medium (0.27 g DMEM powder DMEM,  
589 powder, low glucose, pyruvate in 10 ml ddH<sub>2</sub>O), iii) 6.75  $\mu$ l of NaOH 0.1 N (Carl Roth), iv)  
590 10% v/v Matrigel™ (BD) and v)  $0.8 \times 10^6$  iPSC resuspended in 157.5  $\mu$ l of StemMACS iPS-  
591 Brew XF (Miltenyi Biotec) medium with 5  $\mu$ M Y27632 (Stemgent), 10 ng/ml FGF-2  
592 (Peprotech) and 10% knockout serum replacement (ThermoFisher Scientific) was cast into  
593 circular PDMS molds (inner/outer diameter: 4/6 mm; height: 2.5 mm; volume: 250  $\mu$ l). After  
594 1 h of hydrogel polymerization at 37°C, StemMACS iPS-Brew XF (Miltenyi Biotec) medium  
595 with 5  $\mu$ M Y27632 (Stemgent), 10 ng/ml FGF-2 (Peprotech) and 10% Knockout serum  
596 replacement (ThermoFisher Scientific) was added for 24 hrs. After tissue compaction skeletal  
597 muscle differentiation was induced following the protocol established in 2D. On day 22 of  
598 differentiation, SMOs were loaded on static stretchers at 120% of slack length and cultured in  
599 maturation medium for 4 additional weeks. Maturation medium was changed every second  
600 day and consisted of DMEM, low glucose, GlutaMAX™ Supplement, pyruvate (Thermo  
601 Fisher Scientific) with 1% Pen/Strep (Thermo Fisher Scientific), 1% N-2 Supplement  
602 (Thermo Fisher Scientific), 2% B-27 Supplement (Thermo Fisher Scientific) and 1 mM  
603 creatine monohydrate (Sigma-Aldrich).

604

605



## 606 **Generation of human engineered skeletal muscle**

607 To generate human engineered skeletal muscle (ESM), either PSC-derived skeletal myocytes  
608 were dissociated, or frozen PSC-derived skeletal myocytes were thawed as described above.  
609 A final 250  $\mu$ l/ESM volume mixture of i) 0.23 mg acid soluble collagen type 1 (Collagen  
610 Solutions), ii) 36  $\mu$ l of concentrated 2x DMEM (Thermo Fisher Scientific) serum-free  
611 medium (0.27 g DMEM, powder, low glucose, pyruvate in 10 ml ddH<sub>2</sub>O), iii) 6.75  $\mu$ l of  
612 NaOH 0.1 N (Carl Roth), iv) 10% v/v Matrigel™ (BD) and v)  $1.25 \times 10^6$  of day 22 hPSC-  
613 derived skeletal myocytes which is resuspended in 157.5  $\mu$ l of expansion medium with 5  $\mu$ M  
614 Y27632 (Stemgent), was cast into circular polydimethylsiloxane (PDMS) molds (inner/outer  
615 diameter: 4/6 mm; height: 2.5 mm; volume: 250  $\mu$ l). After 1h of polymerization at 37°C,  
616 ESMs were cultured in expansion medium with 5  $\mu$ M Y27632 (Stemgent) for 24 h and then  
617 expansion medium for another 6 days to consolidate into mechanically stable tissue. After  
618 transfer of ESMs onto static stretchers they were cultured in maturation medium under  
619 mechanical load up to 9 weeks. Maturation medium was changed every second day and  
620 consisted of DMEM with 1% Pen/Strep, 1% N-2 Supplement, 2% B-27 Supplement (all  
621 Thermo Fisher Scientific) and 0.1  $\mu$ M T3 (Sigma-Aldrich). 1 mM creatine monohydrate  
622 (Sigma-Aldrich) was added to maturation medium from week 4 to 9.

623 ESM from primary skeletal myocytes was prepared in an identical way with the exception  
624 that cell resuspension and ESM culture was done in DMEM F12, 2 mmol/L L-glutamine,  
625 15% FBS, 1% Pen Strep, 1:100 ITS-X supplement (all Thermo Scientific) for 48 hrs. ESM  
626 differentiation was then performed in DMEM with 1% Pen/Strep, 1% N-2 Supplement, 2% B-  
627 27 Supplement (all Thermo Fisher Scientific).

628

## 629 **Isometric force measurements**

630 Contractile function of ESM was measured under isometric conditions in a thermostatted  
631 organ bath (Föhr Medical Instruments) filled with gassed (5% CO<sub>2</sub>/95% O<sub>2</sub>) Tyrode's  
632 solution (containing: 120 NaCl, 1 MgCl<sub>2</sub>, 0.2 CaCl<sub>2</sub>, 5.4 KCl, 22.6 NaHCO<sub>3</sub>, 4.2 NaH<sub>2</sub>PO<sub>4</sub>,  
633 5.6 glucose, and 0.56 ascorbate; all in mmol/L) at 37°C. The calcium concentration was set to  
634 1.8 mM. To normalize for the force-length relationship, ESMs were extended to L<sub>max</sub>  
635 (length of maximal twitch tension) under electrical stimulation with 1 Hz with 4 ms square  
636 pulses of 200 mA. At L<sub>max</sub>, twitch tension was assessed at varying frequencies (4-second  
637 long stimulation at 1,2,3,4,5, 10, 20, 40, 60, 80 and 100 Hz). At 1 Hz stimulation,  
638 depolarizing muscle block was induced by addition of the unspecific cholinergic receptor  
639 agonist carbachol (1 µmol/L). Contraction data was recorded with BMON software and  
640 analyzed using AMON software (Ingenieurbüro Jäckel).

641

#### 642 **Cardiotoxin injury model**

643 To induce muscle injury ESM was incubated with 25 µg/ml of of *Naja pallida* cardiotoxin  
644 (CTX; Latoxan) for 24 h in maturation medium (Tiburcy et al. 2019). Subsequently the  
645 injured tissue was rinsed and cultured in expansion medium for 1 week followed by  
646 maturation medium for another 2 weeks of regeneration. Medium was refreshed every second  
647 day. To irradiate the ESM prior to CTX injury the culture plate was placed in a STS Biobeam  
648 8000 gamma irradiator and exposed to a single dose of 30 Gy irradiation over 10 minutes  
649 (Tiburcy et al., 2019).

650

#### 651 **Immunostaining and confocal imaging**

652 2D cell cultures were fixed in 4% formalin (Carl Roth) at 20-22°C for 15 min. ESM/BSM  
653 were fixed in 4% formalin at 4°C overnight. After 2 washes with PBS, ESM/BSM were  
654 plunged in 70% ethanol (Carl Roth) for 1 min and then embedded in 2% agarose (peqGOLD)

655 in 1X Tris Acetate-EDTA (TAE) buffer. Using the Leica Vibrotome (LEICAVT1000S),  
656 sections were cut at 400  $\mu\text{m}$  and kept in cold PBS. Prior to staining, 2D cell cultures as well  
657 as ESM sections were washed with PBS. For blocking and permeabilization, samples were  
658 incubated in blocking buffer (PBS with 5% fetal bovine serum, 1% bovine serum albumin  
659 (BSA), and 0.5% Triton-X). All the primary and secondary antibody staining was performed  
660 in the same blocking solution. The following antibodies were applied for primary staining at  
661 20-22°C for 4h: Oct4 (1:500, Abcam), Pax3-concentrate (1:100, DSHB), Pax7-concentrate  
662 (1:100, DSHB), MyoD (1:100, Dako) and Myogenin-concentrate (1:10, DSHB), Sarcomeric  
663  $\alpha$ -actinin (1:500, Sigma-Aldrich), Laminin (1:50, Sigma-Aldrich), neurofilament H, SMI32  
664 (1:20000, Biolegend),  $\beta$ -dystroglycan (1:50, LCL-b-DG, Leica Biosystem) and Ki67  
665 (1:100, Abcam). After 3x PBS washes for 5 minutes, the appropriate Alexa Fluor-coupled  
666 secondary antibodies (1:1000, Thermo Fisher Scientific) were applied for 2h at 20-24°C. In  
667 parallel with secondary antibodies, Alexa Fluor 633-conjugated phalloidin (1:100, Thermo  
668 Fisher Scientific), Alexa Fluor 594-conjugated  $\alpha$ -Bungarotoxin and Hoechst 33342 (1:1000,  
669 Molecular Probes) were added to stain f-actin and nuclei, respectively. Following 3 washes  
670 with PBS, samples were mounted in Fluoromount-G (Southern Biotech). All the images were  
671 acquired by using a Zeiss LSM 710/NLO confocal microscope. To quantify the labeled cells,  
672 3 randomly focal planes per sample from 3 different experiments were chosen for analysis  
673 with ImageJ cell counter tool.

674

### 675 **Transmission Electron Microscopy**

676 Ultrastructural analysis was performed on ESM samples fixed in 4% formalin (Carl Roth),  
677 15% saturated picric acid in 0.1 M PBS, pH 7.4, at 4°C overnight. ESMs were rinsed twice  
678 with PBS and treated with 0.5% OsO<sub>4</sub> for 45 min following several washing steps in 100  
679 mM phosphate buffer. Samples were counterstained with uranyl acetate, dehydrated via  
680 ethanol series, and embedded in Durcupan ACM epoxy resin (Sigma-Aldrich). Ultrathin

681 sections were prepared from resin blocks using a Leica Ultracut S ultramicrotome  
682 (Mannheim, Germany) and adsorbed to glow-discharged formvar-carbon-coated copper  
683 single-slot grids. Electron micrographs were recorded using a Zeiss LEO 910 electron  
684 microscope; images were taken with a TRS Sharpeye CCD camera (Troendle, Moorenweis,  
685 Germany).

686

### 687 **Flow cytometry**

688 Cells were fixed in 4% formalin (Carl Roth) at 20-22°C for 15 min. Following 2X washes  
689 with PBS, fixed samples were kept on ice for the staining process. Cells were incubated in  
690 blocking buffer (PBS with 5% fetal bovine serum, 1% bovine serum albumin (BSA), and  
691 0.5% Triton-X) for 10 min. In parallel with staining for isotype controls, fixed cells were  
692 stained for Pax7 (1:500, DSHB), MyoD (1:500, Dako) and Myogenin (1:50, DSHB) and  
693 Sarcomeric  $\alpha$ -actinin (1:4000, Sigma-Aldrich), for 45 min. Appropriate secondary antibodies  
694 (1:1000, Thermo Fisher Scientific) were applied for 30 min. Samples were stained with  
695 Hoechst-3342 for nuclear DNA counting and exclusion of cell doublets. Cells were run on a  
696 LSRII cytometer and at least 10,000 events per sample were analyzed using Diva software  
697 (BD Biosciences).

698

### 699 **Western blot analysis**

700 For protein isolation snap frozen ESM was homogenized in 150  $\mu$ l of ice-cold protein lysate  
701 buffer (2.38 g HEPES, 10.20 g NaCl, 100 ml Glycerol, 102 mg MgCl<sub>2</sub>, 93 mg EDTA, 19 mg  
702 EGTA, 5 ml NP-40 in a total volume of 500 ml ddH<sub>2</sub>O) containing phosphatase and protease  
703 inhibitor cocktail (Roche) then centrifuged for 30 min at 12000 rpm at 4°C. 30  $\mu$ g of protein  
704 sample was loaded onto a 4 to 15% gradient sodium dodecyl sulfate (SDS)-polyacrylamid gel  
705 (Bio-Rad), followed by protein transfer to a polyvinylidene fluoride (PVDF) membrane. To

706 visualize the total protein, the PVDF membrane was stained with Ponceau Red. Primary  
707 antibody (4 h at 20-22°C) and secondary antibody (1 h in at 20-22°C) staining was performed  
708 in blocking solution containing 5% milk in 1x Tris-buffered saline (TBS) and 0.1% Tween  
709 20.

710 The following primary antibodies were applied: embryonic myosin heavy chain 3 (1:500,  
711 F1.652, DSHB), slow type myosin heavy chain 7 (1:500, A4.951, DSHB) and fast type  
712 myosin heavy chain 2 (1:100, A4.74, DSHB). Protein loading was controlled by Vinculin  
713 (VCL) antibody (1:5000, V3131, Sigma-Aldrich). Horseradish peroxidase conjugated goat  
714 anti-mouse IgG antibody (1:10000, P0260, Dako) was used for detection. The blots were  
715 developed with Femto LUCENT™ Luminol Reagent (Gbiosciences) and the protein bands  
716 were imaged using the BIO-RAD ChemDoc™ MP system. Protein quantification was  
717 performed using ImageJ.

718

### 719 **RNA expression analysis**

720 RNA was purified using Trizol (Thermo Fisher Scientific) according to the manufacturer's  
721 instructions and quantified using Nanodrop. To analyze skeletal muscle specific transcripts an  
722 nCounter Elements TagSet panel from was designed by NanoString Technologies. Fifty  
723 nanograms of RNA per sample were hybridized to target-specific capture and reporter probes  
724 at 67°C overnight (20h) according to the manufacturer's instructions. Samples were then  
725 loaded into the NanoString cartridge and nCounter Gene Expression Assay started  
726 immediately. Raw reads were analyzed with nSolver™ Data Analysis Software. Background  
727 subtraction was performed using geometric means of negative controls. RNA counts were  
728 normalized to 4 housekeeping genes (*TBP*, *HPRT1*, *POL2RA*, *GAPDH*).

729

### 730 **RNA sequencing**

731 Prior to sequencing RNA quality was ensured with the Fragment Analyzer from Advanced  
732 Analytical by using the standard sensitivity RNA Analysis Kit (DNF-471). RNA-seq libraries  
733 were prepared using a modified strand-specific, massively-parallel cDNA sequencing (RNA-  
734 Seq) protocol from Illumina, the TruSeq Stranded Total RNA. Libraries were sequenced on a  
735 HiSeq 4000 platform (Illumina) generating 50 bp single-end reads (30-40 Mio reads/sample).  
736 Sequence images were transformed with Illumina software BaseCaller to BCL files, which  
737 was demultiplexed to fastq files with bcl2fastq v2.17.1.14. The quality check was done using  
738 FastQC (version 0.11.5). Sequence reads were aligned to the human genome reference  
739 assembly (UCSC version hg38) using Star (version 2.5.2a) (Dobin et al., 2013). For each  
740 gene, the number of mapped reads was counted for human genes in ENSEMBL annotation  
741 hg38 version 89 using featureCounts (version 1.4.5) (Liao et al., 2014). Raw counts were  
742 normalized and transformed to log<sub>2</sub> counts per million (CPM) values. Reads Per Kilobase per  
743 Million mapped reads (RPKM) were calculated based on Ensembl transcript length using  
744 biomaRT (v2.24). All RNA sequencing data has been deposited in a public data base  
745 (GSE178270).

746

#### 747 **Weighted co-expression analysis**

748 Weighted gene co-expression network analysis was performed using (WGCNA) package  
749 (version 1.61) in R. Briefly, normalized counts were transformed into log (base 2) counts and  
750 were used to calculate pairwise bi-weighted mid-correlations between genes. Next, based on  
751 approximate scale-free topology a soft threshold power of 14 was chosen and was used to  
752 calculate pair-wise topological overlap between genes to construct a signed gene co-  
753 expression network. Modules of co-expressed genes was later identified based on following  
754 criteria: minimum module size of 100, method = “hybrid”, deepSplit =0, pamRespectsDendro  
755 =T, pamStage = T. Modules with correlation higher than 0.85 were merged together.

756 Different modules were summarized as modular eigengenes (MEs), those were then used to  
757 compare expression of the given module across differentiation time points. The module  
758 specific genes were further filtered based on a module membership correlation coefficient  
759 cutoff of 0.60. Gene ontology of the modules were analyzed using clusterProfiler (v3.0.4) and  
760 after multiple adjustments only statistically significant gene ontology terms (FDR <0.05) were  
761 retrieved. For pathway analysis, Reactome (<https://reactome.org/>) database was used.

## 762 **Published dataset analysis**

763 Raw data set from a previous study (Xi et al., 2017) was retrieved from NCBI GEO  
764 (accession: GSE90876) and processed as follows: sequencing reads were mapped to  
765 human genome hg38 using STAR aligner (v2.5.2b). After mapping, raw count files were  
766 generated using featureCounts of subread package (v1.5.1). For differential expression  
767 analysis, all samples were processed together and genes with less than 5 reads in 50% of  
768 the samples were filtered out prior to the analysis. Differential expression analysis was  
769 performed using DESeq2 package (version 1.28.1) in R. Genes with FDR < 0.05 were  
770 considered as differentially expressed. To test above chance overlap between previously  
771 identified module and differentially expressed genes, Fisher's exact test was performed.

## 772 **Single cell transcriptomics by single nuclei RNA sequencing**

773 Single nuclei were isolated from flash frozen cells. The cell pellet was homogenized using a  
774 plastic pestle in a 1.5 ml Eppendorf tube containing 500 µl EZ prep lysis buffer (Sigma,  
775 NUC101-1KT) with 30 strokes. The homogenate was transferred into 2 ml microfuge tubes,  
776 lysis buffer was added up to 2 ml and incubated on ice for 7 minutes. After centrifuging for 5  
777 minutes at 500xg supernatant was removed and the nuclear pellet was resuspended into 2 ml  
778 lysis buffer and incubated again on ice (7 minutes). After centrifuging for 5 minutes at 500xg,  
779 the supernatant was removed and the nuclei pellet was resuspended into 500 µl nuclei storage

780 buffer (NSB: 1x PBS; Invitrogen, 0.5% RNase free BSA; Serva, 1:200 RNaseIN plus  
781 inhibitor; Promega, 1x EDTA-free protease inhibitor; Roche) and filtered through 40 µm filter  
782 (BD falcon) with additional 100 µL NSB to collect residual nuclei from the filter. Isolated  
783 nuclei were stained with a nuclear stain (7AAD) and FACS sorted (BD FACSaria III) to  
784 ensure a homogenous and viable nucleus preparation. Sorted nuclei were counted in a  
785 Countess FL II automated cell counter (ThermoFischer AMQAF1000, DAPI light cube:  
786 ThermoFischer: AMEP4650) with DAPI staining and nuclei concentration was adjusted to  
787 1000 nuclei/µL. The nuclei were further diluted to capture and barcode 4000 nuclei according  
788 to Chromium single cell 3<sup>v3</sup> reagent kit v3 (10X Genomics). Single nuclei barcoding, GEM  
789 formation, reverse transcription, cDNA synthesis and library preparation were performed  
790 according to 10X Genomics guidelines. cDNA libraries were pooled and sequenced 4 times in  
791 Illumina NextSeq 550 in order to achieve the target reads / nuclei. Each sequencing run was  
792 acquiring 150bp paired-end reads (Illumina NextSeq 550 High Output Kit v2.5).  
793 Demultiplexing, read mapping (to pre-mRNA reference genome) and gene counts per nuclei  
794 were computed with cellranger (v4.0) software. The nuclei barcoding and sequencing pipeline  
795 typically allows to obtain 50.000-100.000 reads/nucleus resulting in detection of 200-10.000  
796 genes/nucleus (median: ~2000 genes/nucleus) for further downstream analysis.

### 797 **Bioinformatic analysis of single-nucleus RNA-sequencing**

798 Gene counts were obtained by aligning reads to the hg38 genome (NCBI:GCA  
799 000001405.22) (GRCh38.p7) using CellRanger software (v.3.0.2) (10XGenomics). The  
800 CellRanger count pipeline was used to generate a gene-count matrix by mapping reads to the  
801 pre-mRNA as reference to account for unspliced nuclear transcripts. The SCANPY package  
802 was used for pre-filtering, normalization and clustering (Wolf et al., 2018). Initially, cells that  
803 reflected low-quality cells (based on read number and expression of house-keeping genes  
804 (Eisenberg and Levanon, 2013)) were excluded. Next, counts were scaled by the total library



805 size multiplied by 10.000, and transformed to log space. Highly variable genes were identified  
806 based on dispersion and mean, the technical influence of the total number of counts was  
807 regressed out, and the values were rescaled. Principal component analysis (PCA) was  
808 performed on the variable genes, and UMAP was run on the top 50 principal components  
809 (PCs) (Becht et al., 2018). The top 50 PCs were used to build a k-nearest-neighbours cell–cell  
810 graph with k= 100 neighbors. Subsequently, spectral decomposition over the graph was  
811 performed with 50 components, and the Leiden graph-clustering algorithm was applied to  
812 identify cell clusters. We confirmed that the number of PCs captures almost all the variance of  
813 the data. For each cluster, we assigned a cell-type label using manual evaluation of gene  
814 expression for sets of known marker genes. A muscle gene panel was identified by calculating  
815 the differentially expressed genes between myogenic and non-muscle cluster with a low  
816 frequency cutoff of 1 and an adjusted p value of <0.05.

## 817 **Statistical analysis**

818 All data were analyzed using GraphPad Prism 7 software (GraphPad Software Inc., San  
819 Diego) and presented as mean  $\pm$  standard error of the mean (SEM). Statistical analyses were  
820 done using unpaired, two-tailed, Student's t-test, 1-way or 2-way ANOVA where appropriate.  
821 Significantly different variances were corrected for. Results showing  $p < 0.05$  were considered  
822 significant and  $n$  indicates the number of samples.

823

## 824 **References**

825 Afshar Bakooshli, M., Lippmann, E.S., Mulcahy, B., Iyer, N., Nguyen, C.T., Tung, K., Stewart, B.A., van  
826 den Dorpel, H., Fuehrmann, T., Shoichet, M., *et al.* (2019). A 3D culture model of innervated human  
827 skeletal muscle enables studies of the adult neuromuscular junction. *eLife* 8.  
828 Al-Qusairi, L., and Laporte, J. (2011). T-tubule biogenesis and triad formation in skeletal muscle and  
829 implication in human diseases. *Skelet Muscle* 1, 26.  
830 Albin, S., Coutinho, P., Malecova, B., Giordani, L., Savchenko, A., Forcales, S.V., and Puri, P.L. (2013).  
831 Epigenetic reprogramming of human embryonic stem cells into skeletal muscle cells and generation  
832 of contractile myospheres. *Cell Rep* 3, 661-670.

833 Baghbaderani, B.A., Tian, X., Neo, B.H., Burkall, A., Dimezzo, T., Sierra, G., Zeng, X., Warren, K.,  
834 Kovarcik, D.P., Fellner, T., *et al.* (2015). cGMP-Manufactured Human Induced Pluripotent Stem Cells  
835 Are Available for Pre-clinical and Clinical Applications. *Stem Cell Reports* 5, 647-659.  
836 Becht, E., McInnes, L., Healy, J., Dutertre, C.A., Kwok, I.W.H., Ng, L.G., Ginhoux, F., and Newell, E.W.  
837 (2018). Dimensionality reduction for visualizing single-cell data using UMAP. *Nat Biotechnol.*  
838 Bi, P., Ramirez-Martinez, A., Li, H., Cannavino, J., McAnally, J.R., Shelton, J.M., Sanchez-Ortiz, E.,  
839 Bassel-Duby, R., and Olson, E.N. (2017). Control of muscle formation by the fusogenic micropeptide  
840 myomixer. *Science* 356, 323-327.  
841 Biressi, S., Molinaro, M., and Cossu, G. (2007). Cellular heterogeneity during vertebrate skeletal  
842 muscle development. *Dev Biol* 308, 281-293.  
843 Bladt, F., Riethmacher, D., Isenmann, S., Aguzzi, A., and Birchmeier, C. (1995). Essential role for the c-  
844 met receptor in the migration of myogenic precursor cells into the limb bud. *Nature* 376, 768-771.  
845 Borchin, B., Chen, J., and Barberi, T. (2013). Derivation and FACS-mediated purification of  
846 PAX3+/PAX7+ skeletal muscle precursors from human pluripotent stem cells. *Stem Cell Reports* 1,  
847 620-631.  
848 Buckingham, M. (2017). Gene regulatory networks and cell lineages that underlie the formation of  
849 skeletal muscle. *Proc Natl Acad Sci U S A* 114, 5830-5837.  
850 Buckingham, M., and Mayeuf, A. (2012). Skeletal Muscle Development. *Muscle Volume 2*, 749-762.  
851 Buller, A.J., and Lewis, D.M. (1965). The Rate of Tension Development in Isometric Tetanic  
852 Contractions of Mammalian Fast and Slow Skeletal Muscle. *J Physiol* 176, 337-354.  
853 Caron, L., Kher, D., Lee, K.L., McKernan, R., Dumevska, B., Hidalgo, A., Li, J., Yang, H., Main, H., Ferri,  
854 G., *et al.* (2016). A Human Pluripotent Stem Cell Model of Facioscapulohumeral Muscular Dystrophy-  
855 Affected Skeletal Muscles. *Stem Cells Transl Med* 5, 1145-1161.  
856 Chal, J., Al Tanoury, Z., Hestin, M., Gobert, B., Aivio, S., Hick, A., Cherrier, T., Nesmith, A.P., Parker,  
857 K.K., and Pourquie, O. (2016). Generation of human muscle fibers and satellite-like cells from human  
858 pluripotent stem cells in vitro. *Nat Protoc* 11, 1833-1850.  
859 Chal, J., Oginuma, M., Al Tanoury, Z., Gobert, B., Sumara, O., Hick, A., Bousson, F., Zidouni, Y.,  
860 Mursch, C., Moncuquet, P., *et al.* (2015). Differentiation of pluripotent stem cells to muscle fiber to  
861 model Duchenne muscular dystrophy. *Nat Biotechnol* 33, 962-969.  
862 Choi, I.Y., Lim, H., Estrellas, K., Mula, J., Cohen, T.V., Zhang, Y., Donnelly, C.J., Richard, J.P., Kim, Y.J.,  
863 Kim, H., *et al.* (2016). Concordant but Varied Phenotypes among Duchenne Muscular Dystrophy  
864 Patient-Specific Myoblasts Derived using a Human iPSC-Based Model. *Cell Rep* 15, 2301-2312.  
865 Cornelison, D.D., and Wold, B.J. (1997). Single-cell analysis of regulatory gene expression in quiescent  
866 and activated mouse skeletal muscle satellite cells. *Dev Biol* 191, 270-283.  
867 Cossu, G., Kelly, R., Tajbakhsh, S., Di Donna, S., Vivarelli, E., and Buckingham, M. (1996). Activation of  
868 different myogenic pathways: myf-5 is induced by the neural tube and MyoD by the dorsal ectoderm  
869 in mouse paraxial mesoderm. *Development* 122, 429-437.  
870 Coumailleau, P., and Duprez, D. (2009). Sim1 and Sim2 expression during chick and mouse limb  
871 development. *Int J Dev Biol* 53, 149-157.  
872 Darabi, R., Arpke, R.W., Irion, S., Dimos, J.T., Grskovic, M., Kyba, M., and Perlingeiro, R.C. (2012).  
873 Human ES- and iPS-derived myogenic progenitors restore DYSTROPHIN and improve contractility  
874 upon transplantation in dystrophic mice. *Cell Stem Cell* 10, 610-619.  
875 Davis, R.L., Weintraub, H., and Lassar, A.B. (1987). Expression of a single transfected cDNA converts  
876 fibroblasts to myoblasts. *Cell* 51, 987-1000.  
877 DeChiara, T.M., Bowen, D.C., Valenzuela, D.M., Simmons, M.V., Poueymirou, W.T., Thomas, S.,  
878 Kinetz, E., Compton, D.L., Rojas, E., Park, J.S., *et al.* (1996). The receptor tyrosine kinase MuSK is  
879 required for neuromuscular junction formation in vivo. *Cell* 85, 501-512.  
880 Dobin, A., Davis, C.A., Schlesinger, F., Drenkow, J., Zaleski, C., Jha, S., Batut, P., Chaisson, M., and  
881 Gingeras, T.R. (2013). STAR: ultrafast universal RNA-seq aligner. *Bioinformatics* 29, 15-21.  
882 Eisenberg, E., and Levanon, E.Y. (2013). Human housekeeping genes, revisited. *Trends Genet* 29, 569-  
883 574.

884 Faustino Martins, J.M., Fischer, C., Urzi, A., Vidal, R., Kunz, S., Ruffault, P.L., Kabuss, L., Hube, I.,  
885 Gazzero, E., Birchmeier, C., *et al.* (2020). Self-Organizing 3D Human Trunk Neuromuscular Organoids.  
886 *Cell Stem Cell* 27, 498.  
887 Goudenege, S., Lebel, C., Huot, N.B., Dufour, C., Fujii, I., Gekas, J., Rousseau, J., and Tremblay, J.P.  
888 (2012). Myoblasts derived from normal hESCs and dystrophic hiPSCs efficiently fuse with existing  
889 muscle fibers following transplantation. *Mol Ther* 20, 2153-2167.  
890 Hirsinger, E., Malapert, P., Dubrulle, J., Delfini, M.C., Duprez, D., Henrique, D., Ish-Horowicz, D., and  
891 Pourquie, O. (2001). Notch signalling acts in postmitotic avian myogenic cells to control MyoD  
892 activation. *Development* 128, 107-116.  
893 Juhas, M., Engelmayr, G.C., Jr., Fontanella, A.N., Palmer, G.M., and Bursac, N. (2014). Biomimetic  
894 engineered muscle with capacity for vascular integration and functional maturation in vivo. *Proc Natl*  
895 *Acad Sci U S A* 111, 5508-5513.  
896 Kablar, B., Krastel, K., Ying, C., Asakura, A., Tapscott, S.J., and Rudnicki, M.A. (1997). MyoD and Myf-5  
897 differentially regulate the development of limb versus trunk skeletal muscle. *Development* 124,  
898 4729-4738.  
899 Kim, J., Magli, A., Chan, S.S.K., Oliveira, V.K.P., Wu, J., Darabi, R., Kyba, M., and Perlingeiro, R.C.R.  
900 (2017). Expansion and Purification Are Critical for the Therapeutic Application of Pluripotent Stem  
901 Cell-Derived Myogenic Progenitors. *Stem Cell Reports* 9, 12-22.  
902 Larsson, L., Li, X., Teresi, A., and Salvati, G. (1994). Effects of thyroid hormone on fast- and slow-  
903 twitch skeletal muscles in young and old rats. *J Physiol* 481 ( Pt 1), 149-161.  
904 Lian, X., Hsiao, C., Wilson, G., Zhu, K., Hazeltine, L.B., Azarin, S.M., Raval, K.K., Zhang, J., Kamp, T.J.,  
905 and Palecek, S.P. (2012). Robust cardiomyocyte differentiation from human pluripotent stem cells via  
906 temporal modulation of canonical Wnt signaling. *Proc Natl Acad Sci U S A* 109, E1848-1857.  
907 Liao, Y., Smyth, G.K., and Shi, W. (2014). featureCounts: an efficient general purpose program for  
908 assigning sequence reads to genomic features. *Bioinformatics* 30, 923-930.  
909 Long, C., Li, H., Tiburcy, M., Rodriguez-Caycedo, C., Kyrychenko, V., Zhou, H., Zhang, Y., Min, Y.L.,  
910 Shelton, J.M., Mammen, P.P.A., *et al.* (2018). Correction of diverse muscular dystrophy mutations in  
911 human engineered heart muscle by single-site genome editing. *Sci Adv* 4, eaap9004.  
912 Maffioletti, S.M., Sarcar, S., Henderson, A.B.H., Mannhardt, I., Pinton, L., Moyle, L.A., Steele-Stallard,  
913 H., Cappellari, O., Wells, K.E., Ferrari, G., *et al.* (2018). Three-Dimensional Human iPSC-Derived  
914 Artificial Skeletal Muscles Model Muscular Dystrophies and Enable Multilineage Tissue Engineering.  
915 *Cell Rep* 23, 899-908.  
916 Mamchaoui, K., Trollet, C., Bigot, A., Negroni, E., Chaouch, S., Wolff, A., Kandalla, P.K., Marie, S., Di  
917 Santo, J., St Guily, J.L., *et al.* (2011). Immortalized pathological human myoblasts: towards a universal  
918 tool for the study of neuromuscular disorders. *Skelet Muscle* 1, 34.  
919 Mayeuf-Louchart, A., Lagha, M., Danckaert, A., Rocancourt, D., Relaix, F., Vincent, S.D., and  
920 Buckingham, M. (2014). Notch regulation of myogenic versus endothelial fates of cells that migrate  
921 from the somite to the limb. *Proc Natl Acad Sci U S A* 111, 8844-8849.  
922 Mazaleyrat, K., Badja, C., Broucqsaault, N., Chevalier, R., Laberthonniere, C., Dion, C., Baldasseroni, L.,  
923 El-Yazidi, C., Thomas, M., Bachelier, R., *et al.* (2020). Multilineage Differentiation for Formation of  
924 Innervated Skeletal Muscle Fibers from Healthy and Diseased Human Pluripotent Stem Cells. *Cells* 9.  
925 Meech, R., Gonzalez, K.N., Barro, M., Gromova, A., Zhuang, L., Hulin, J.A., and Makarenkova, H.P.  
926 (2012). Barx2 is expressed in satellite cells and is required for normal muscle growth and  
927 regeneration. *Stem Cells* 30, 253-265.  
928 Mendjan, S., Mascetti, V.L., Ortman, D., Ortiz, M., Karjosukarso, D.W., Ng, Y., Moreau, T., and  
929 Pedersen, R.A. (2014). NANOG and CDX2 pattern distinct subtypes of human mesoderm during exit  
930 from pluripotency. *Cell Stem Cell* 15, 310-325.  
931 Millay, D.P., Sutherland, L.B., Bassel-Duby, R., and Olson, E.N. (2014). Myomaker is essential for  
932 muscle regeneration. *Genes Dev* 28, 1641-1646.  
933 Miura, S., Davis, S., Klingensmith, J., and Mishina, Y. (2006). BMP signaling in the epiblast is required  
934 for proper recruitment of the prospective paraxial mesoderm and development of the somites.  
935 *Development* 133, 3767-3775.

- 936 Rajakumari, S., Wu, J., Ishibashi, J., Lim, H.W., Giang, A.H., Won, K.J., Reed, R.R., and Seale, P. (2013).  
937 EBF2 determines and maintains brown adipocyte identity. *Cell Metab* *17*, 562-574.
- 938 Rao, L., Qian, Y., Khodabukus, A., Ribar, T., and Bursac, N. (2018). Engineering human pluripotent  
939 stem cells into a functional skeletal muscle tissue. *Nat Commun* *9*, 126.
- 940 Reijntjes, S., Stricker, S., and Mankoo, B.S. (2007). A comparative analysis of Meox1 and Meox2 in the  
941 developing somites and limbs of the chick embryo. *Int J Dev Biol* *51*, 753-759.
- 942 Rios, A.C., Serralbo, O., Salgado, D., and Marcelle, C. (2011). Neural crest regulates myogenesis  
943 through the transient activation of NOTCH. *Nature* *473*, 532-535.
- 944 Schiaffino, S., Ausoni, S., Gorza, L., Saggin, L., Gundersen, K., and Lomo, T. (1988). Myosin heavy chain  
945 isoforms and velocity of shortening of type 2 skeletal muscle fibres. *Acta Physiol Scand* *134*, 575-576.
- 946 Schmidt, J., Barthel, K., Wrede, A., Salajegheh, M., Bahr, M., and Dalakas, M.C. (2008). Interrelation  
947 of inflammation and APP in sIBM: IL-1 beta induces accumulation of beta-amyloid in skeletal muscle.  
948 *Brain* *131*, 1228-1240.
- 949 Selvaraj, S., Mondragon-Gonzalez, R., Xu, B., Magli, A., Kim, H., Laine, J., Kiley, J., McKee, H., Rinaldi,  
950 F., Aho, J., *et al.* (2019). Screening identifies small molecules that enhance the maturation of human  
951 pluripotent stem cell-derived myotubes. *eLife* *8*.
- 952 Sharma, K., Leonard, A.E., Lettieri, K., and Pfaff, S.L. (2000). Genetic and epigenetic mechanisms  
953 contribute to motor neuron pathfinding. *Nature* *406*, 515-519.
- 954 Shelton, M., Kocharyan, A., Liu, J., Skerjanc, I.S., and Stanford, W.L. (2016). Robust generation and  
955 expansion of skeletal muscle progenitors and myocytes from human pluripotent stem cells. *Methods*  
956 *101*, 73-84.
- 957 Shelton, M., Metz, J., Liu, J., Carpenedo, R.L., Demers, S.P., Stanford, W.L., and Skerjanc, I.S. (2014).  
958 Derivation and expansion of PAX7-positive muscle progenitors from human and mouse embryonic  
959 stem cells. *Stem Cell Reports* *3*, 516-529.
- 960 Simonides, W.S., and van Hardeveld, C. (2008). Thyroid hormone as a determinant of metabolic and  
961 contractile phenotype of skeletal muscle. *Thyroid* *18*, 205-216.
- 962 Soong, P.L., Tiburcy, M., and Zimmermann, W.H. (2012). Cardiac differentiation of human embryonic  
963 stem cells and their assembly into engineered heart muscle. *Curr Protoc Cell Biol Chapter 23*, Unit23  
964 28.
- 965 Striedinger, K., Barruet, E., and Pomerantz, J.H. (2021). Purification and preservation of satellite cells  
966 from human skeletal muscle. *STAR Protoc* *2*, 100302.
- 967 Tedesco, F.S., Gerli, M.F., Perani, L., Benedetti, S., Ungaro, F., Cassano, M., Antonini, S., Tagliafico, E.,  
968 Artusi, V., Longa, E., *et al.* (2012). Transplantation of genetically corrected human iPSC-derived  
969 progenitors in mice with limb-girdle muscular dystrophy. *Sci Transl Med* *4*, 140ra189.
- 970 Tiburcy, M., Hudson, J.E., Balfanz, P., Schlick, S., Meyer, T., Chang Liao, M.L., Levent, E., Raad, F.,  
971 Zeidler, S., Wingender, E., *et al.* (2017). Defined Engineered Human Myocardium With Advanced  
972 Maturation for Applications in Heart Failure Modeling and Repair. *Circulation* *135*, 1832-1847.
- 973 Tiburcy, M., Markov, A., Kraemer, L.K., Christalla, P., Rave-Fraenk, M., Fischer, H.J., Reichardt, H.M.,  
974 and Zimmermann, W.H. (2019). Regeneration competent satellite cell niches in rat engineered  
975 skeletal muscle. *FASEB Bioadv* *1*, 731-746.
- 976 Tiburcy, M., Meyer, T., Soong, P.L., and Zimmermann, W.H. (2014). Collagen-based engineered heart  
977 muscle. *Methods Mol Biol* *1181*, 167-176.
- 978 Uezumi, A., Fukada, S., Yamamoto, N., Takeda, S., and Tsuchida, K. (2010). Mesenchymal progenitors  
979 distinct from satellite cells contribute to ectopic fat cell formation in skeletal muscle. *Nat Cell Biol* *12*,  
980 143-152.
- 981 Wolf, F.A., Angerer, P., and Theis, F.J. (2018). SCANPY: large-scale single-cell gene expression data  
982 analysis. *Genome Biol* *19*, 15.
- 983 Xi, H., Fujiwara, W., Gonzalez, K., Jan, M., Liebscher, S., Van Handel, B., Schenke-Layland, K., and Pyle,  
984 A.D. (2017). In Vivo Human Somitogenesis Guides Somite Development from hPSCs. *Cell Rep* *18*,  
985 1573-1585.

986 Xi, H., Langerman, J., Sabri, S., Chien, P., Young, C.S., Younesi, S., Hicks, M., Gonzalez, K., Fujiwara, W.,  
987 Marzi, J., *et al.* (2020). A Human Skeletal Muscle Atlas Identifies the Trajectories of Stem and  
988 Progenitor Cells across Development and from Human Pluripotent Stem Cells. *Cell Stem Cell*.  
989 Xu, B., Zhang, M., Perlingeiro, R.C.R., and Shen, W. (2019). Skeletal Muscle Constructs Engineered  
990 from Human Embryonic Stem Cell Derived Myogenic Progenitors Exhibit Enhanced Contractile Forces  
991 When Differentiated in a Medium Containing EGM-2 Supplements. *Adv Biosyst* 3, e1900005.  
992 Young, C.S., Hicks, M.R., Ermolova, N.V., Nakano, H., Jan, M., Younesi, S., Karumbayaram, S.,  
993 Kumagai-Cresse, C., Wang, D., Zack, J.A., *et al.* (2016). A Single CRISPR-Cas9 Deletion Strategy that  
994 Targets the Majority of DMD Patients Restores Dystrophin Function in hiPSC-Derived Muscle Cells.  
995 *Cell Stem Cell* 18, 533-540.

996

997

998

999

1000 **Figures**

1001

## Figure 1

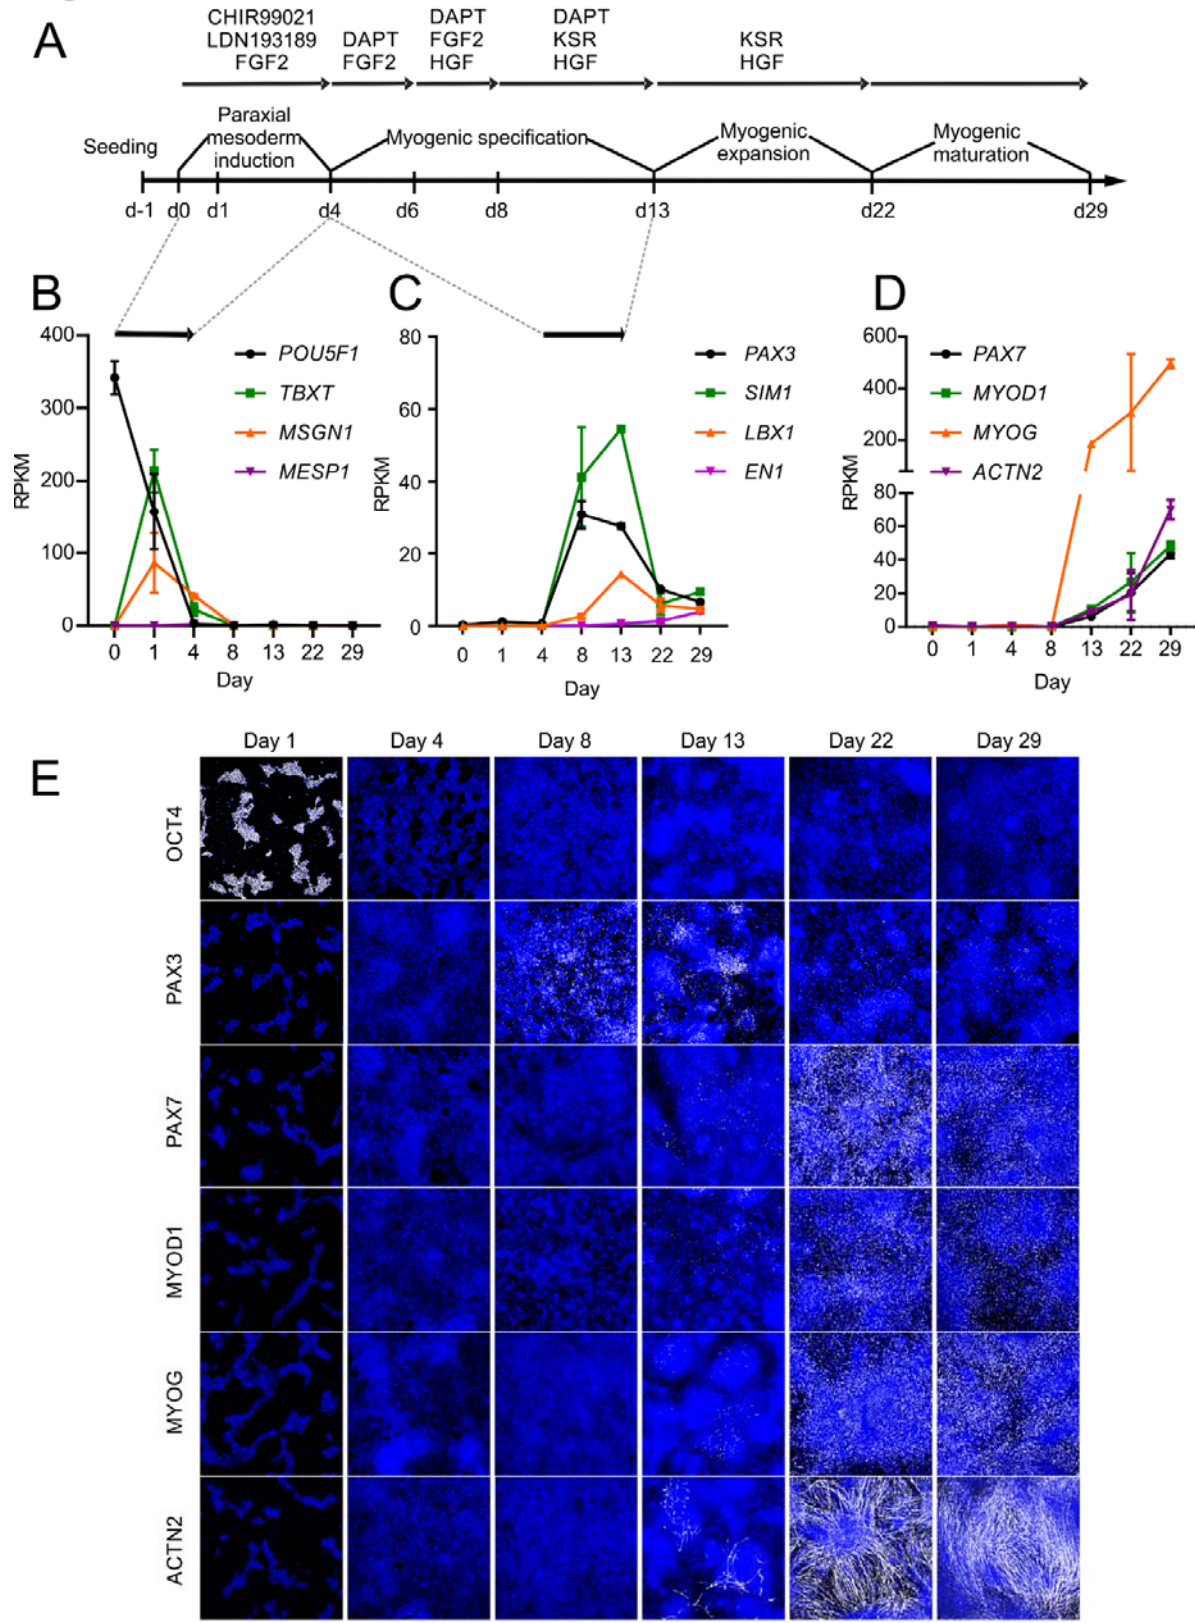

1002  
1003

**Figure 1. Hypaxial skeletal myocyte differentiation from human pluripotent stem cells.**

1004 (A) Summary of the protocol for directed skeletal muscle differentiation from pluripotent  
1005 stem cells (PSC) indicating the sequence and the timing of factor addition to modulate  
1006 specific signaling pathways involved in skeletal myogenesis. Reads Per Kilobase Million  
1007 (RPKM) of signature genes for (B) pluripotency (*POU5F1*), naïve mesoderm (*TBX1*),  
1008 paraxial mesoderm (*MSGN1*), and lateral plate mesoderm (*MESPI1*); (C) dermomyotome  
1009 formation (*PAX3*), hypaxial (*SIMI1*, *LBX1*) and epaxial (*EN1*) dermomyotome, and (D),  
1010 myogenic regulatory factors (*PAX7*, *MYOD1* and *MYOG*) and structural assembly (*ACTN2*),  
1011 during skeletal muscle differentiation from human PSCs; n = 2-4/time point. (E)  
1012 Immunostaining of OCT4, PAX3, PAX7, MYOD1, MYOGENIN, sarcomeric  $\alpha$  -ACTININ  
1013 (in gray), and nuclei (blue) at indicated time points of skeletal muscle differentiation. Scale  
1014 bar: 500  $\mu$ m.

## Figure 2

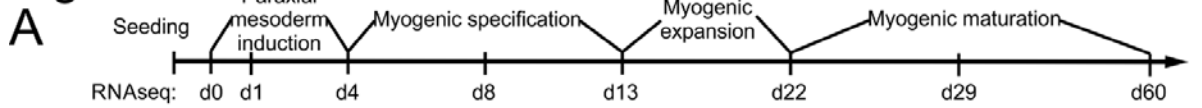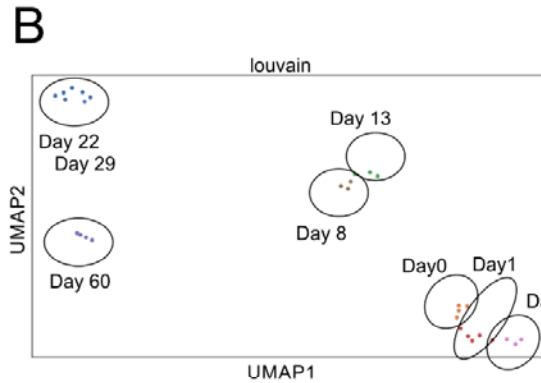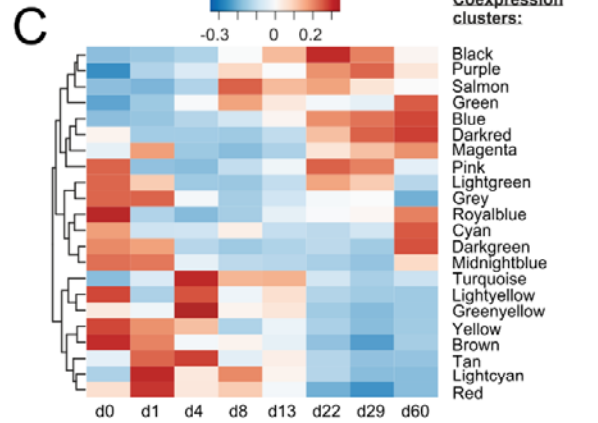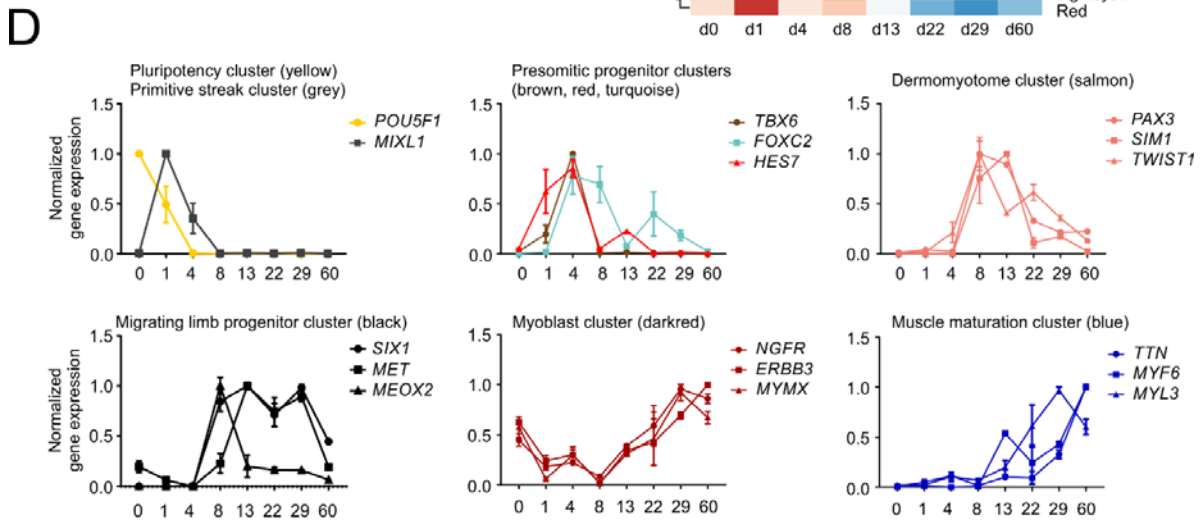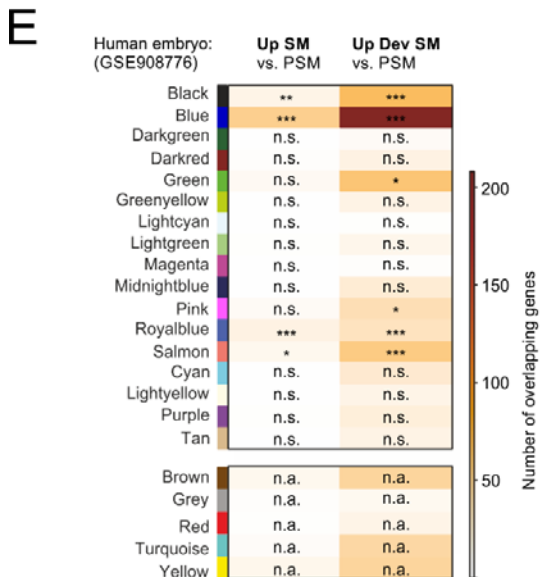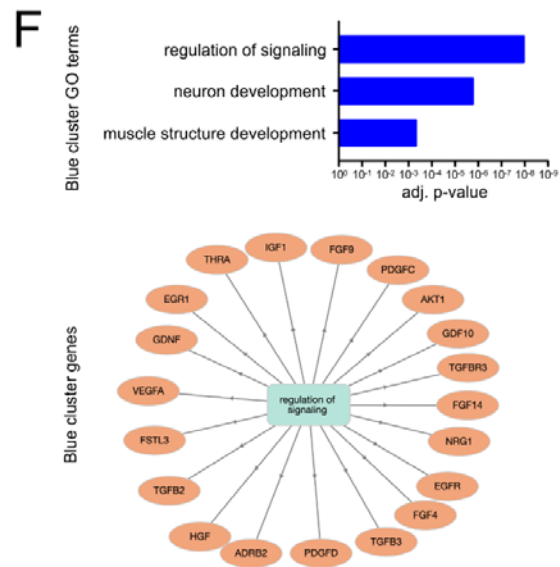

1015  
1016



1017 **Figure 2. Developmental transcriptome patterns in PSC skeletal myocyte differentiation.**

1018 (A) Scheme of skeletal muscle differentiation from hPSCs with sampling time points for RNA  
1019 sequencing. (B) Unsupervised clustering of the samples from different time points. (C)  
1020 Weighted coexpression analysis identified 22 cluster of genes with similar expression  
1021 dynamics (coexpression clusters); a heatmap of mean eigen values is displayed. Clusters are  
1022 generically labeled by colors. (D) Normalized expression levels (RPKM) of indicated  
1023 signature genes in identified coexpression clusters, n = 2-4/time point. (E) Developmentally  
1024 regulated genes were identified based on a published human embryonic muscle data set (Xi et  
1025 al. 2017). The table indicates the overlap of coexpression cluster genes to genes regulated  
1026 between presomitic mesoderm (PSM) and nascent somite (SM) or presomitic mesoderm  
1027 (PSM) and developed somite (Dev SM). Overlap is graded as either not significant (n.s.),  
1028  $p < 0.05$  (\*),  $p < 0.01$  (\*\*), or  $p < 0.001$  (\*\*\*) by Fishers's exact test. The color codes for the  
1029 number of genes overlapping. Early developmental clusters that cannot be represented in the  
1030 embryo data set are labelled as not applicable (n.a.). (F) GO terms specifically enriched in  
1031 coexpression cluster blue (**top panel**). List of genes associated with "regulation of signaling"  
1032 in coexpression cluster blue (**bottom panel**).

1033  
1034  
1035  
1036  
1037  
1038

## Figure 3

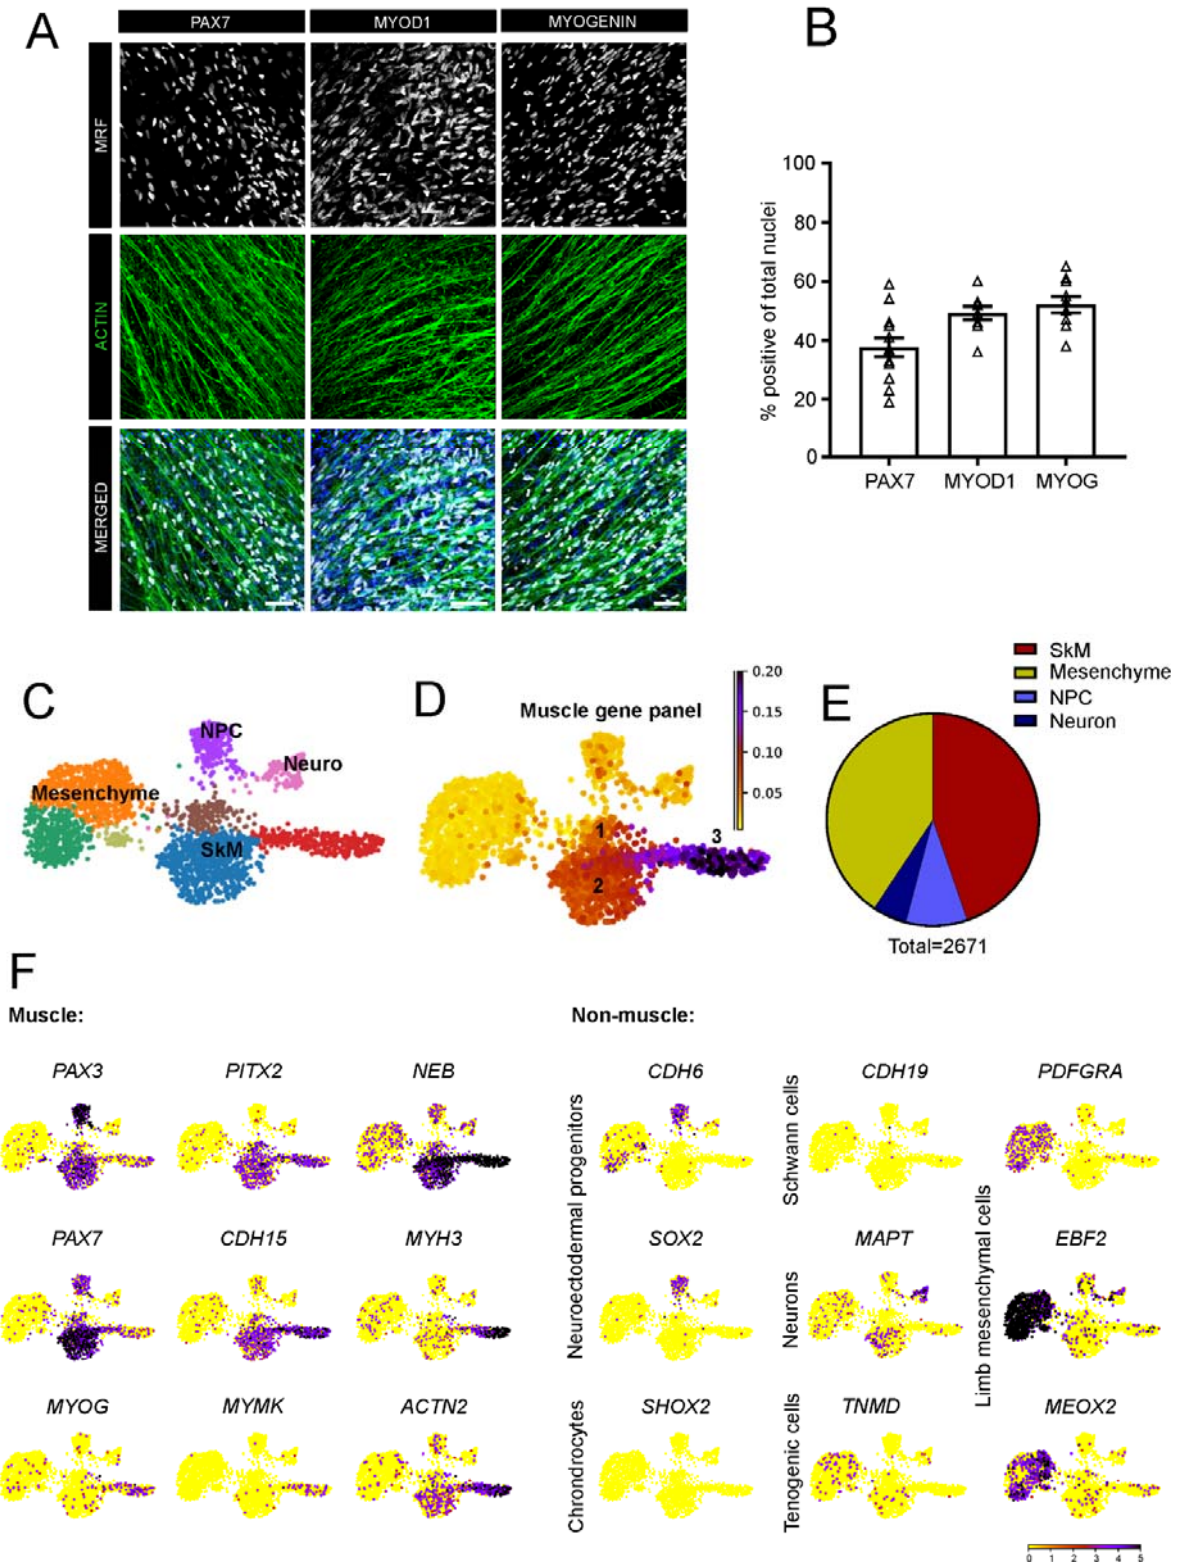

1039  
1040  
1041

1042 **Figure 3. Cellular composition of differentiated skeletal myogenic cultures. (A)**  
1043 Representative immunostaining of myogenic regulatory factors (MRF): PAX7, MYOD1 and  
1044 MYOGENIN (gray), f-ACTIN (green) and nuclei (blue) in 22 days old skeletal muscle  
1045 cultures from TC1133 (iPSC 1) line; Scale bars: 50  $\mu$ m. **(B)** Quantification of nuclei positive  
1046 for PAX7, MYOD1 and MYOGENIN in 22 days old myogenic cultures from HES2 and from  
1047 TC1133 (iPSC 1) lines; n = 9 -13 differentiations. **(C)** Unsupervised clustering (UMAP) of  
1048 single nuclei transcriptomes from a day 22 skeletal muscle culture. **(D)** A muscle gene panel  
1049 identifies 3 myogenic cell clusters (skeletal muscle cells, SkM). **(E)** Quantification of skeletal  
1050 muscle cells (SkM), neuroectodermal progenitor cells (NPC), neurons, and mesenchymal  
1051 progenitor cells (limb mesenchyme) of a total of 2,671 nuclei analyzed. **(F)** Expression levels  
1052 of representative muscle-related genes and non-muscle genes.

1053

1054

1055

## Figure 4

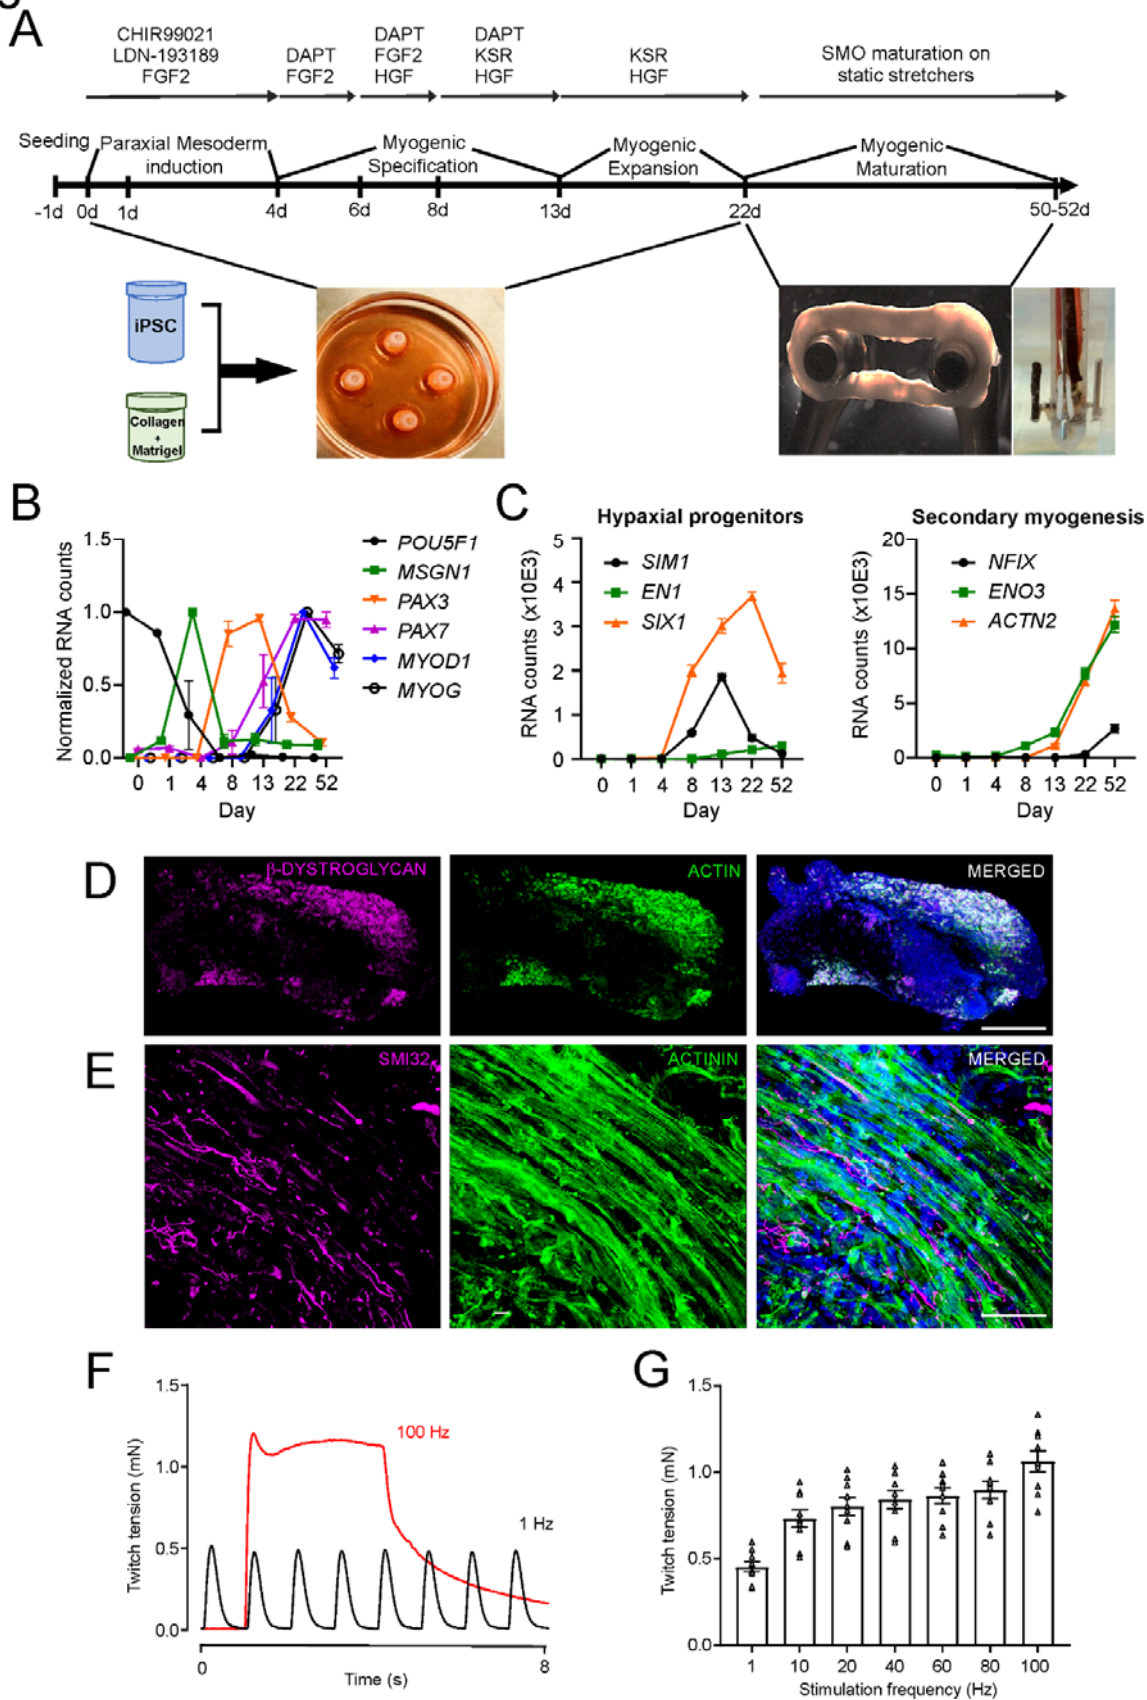

1057 **Figure 4. Generation of functional hypaxial skeletal muscle organoids.** (A) Skeletal  
1058 muscle organoids (SMO) were generated from iPSC mixed with collagen type 1 and  
1059 Matrigel™ in a ring-shaped hydrogel. After consolidation in PDMS casting molds, SMOs  
1060 were directed towards skeletal muscle using the protocol established in monolayer cultures.  
1061 Following functional maturation under isometric load for 3-5 wks (day 22 to 52), twitch  
1062 tension (TT) was measured under isometric conditions in a thermostatted organ bath. Scale  
1063 bar: 5 mm. (B) RNA expression of indicated genes (RNA counts measured by nCounter)  
1064 normalized to minimal and maximal expression at different days of SMO culture. (C) RNA  
1065 expression (RNA counts measured by nCounter) of marker genes of hypaxial progenitor cells  
1066 (left panel) and secondary myogenesis (right panel). (D) Immunostaining of the total muscle  
1067 area in cross sections of BSM with  $\beta$ -DYSTROGLYCAN (magenta), ACTIN+ (green), and  
1068 Nuclei (blue). Scale bar: 500  $\mu$ m. (E) Immunostaining of neurofilament heavy SMI32  
1069 (magenta), sarcomeric  $\alpha$ -ACTININ (green) and nuclei (blue) in longitudinal sections of  
1070 BSM. Scale bar: 50  $\mu$ m. (F) Representative force traces of 4 weeks old SMO with electrical  
1071 stimulation at 1 Hz (black curve) and at 100 Hz (red curve). (G) Quantification of the twitch  
1072 tension (TT) generated by 4 weeks old SMO in response to increasing stimulation  
1073 frequencies; n = 9/group.

1074  
1075  
1076  
1077  
1078  
1079  
1080  
1081  
1082  
1083  
1084  
1085  
1086  
1087  
1088  
1089

1090  
1091

## Figure 5

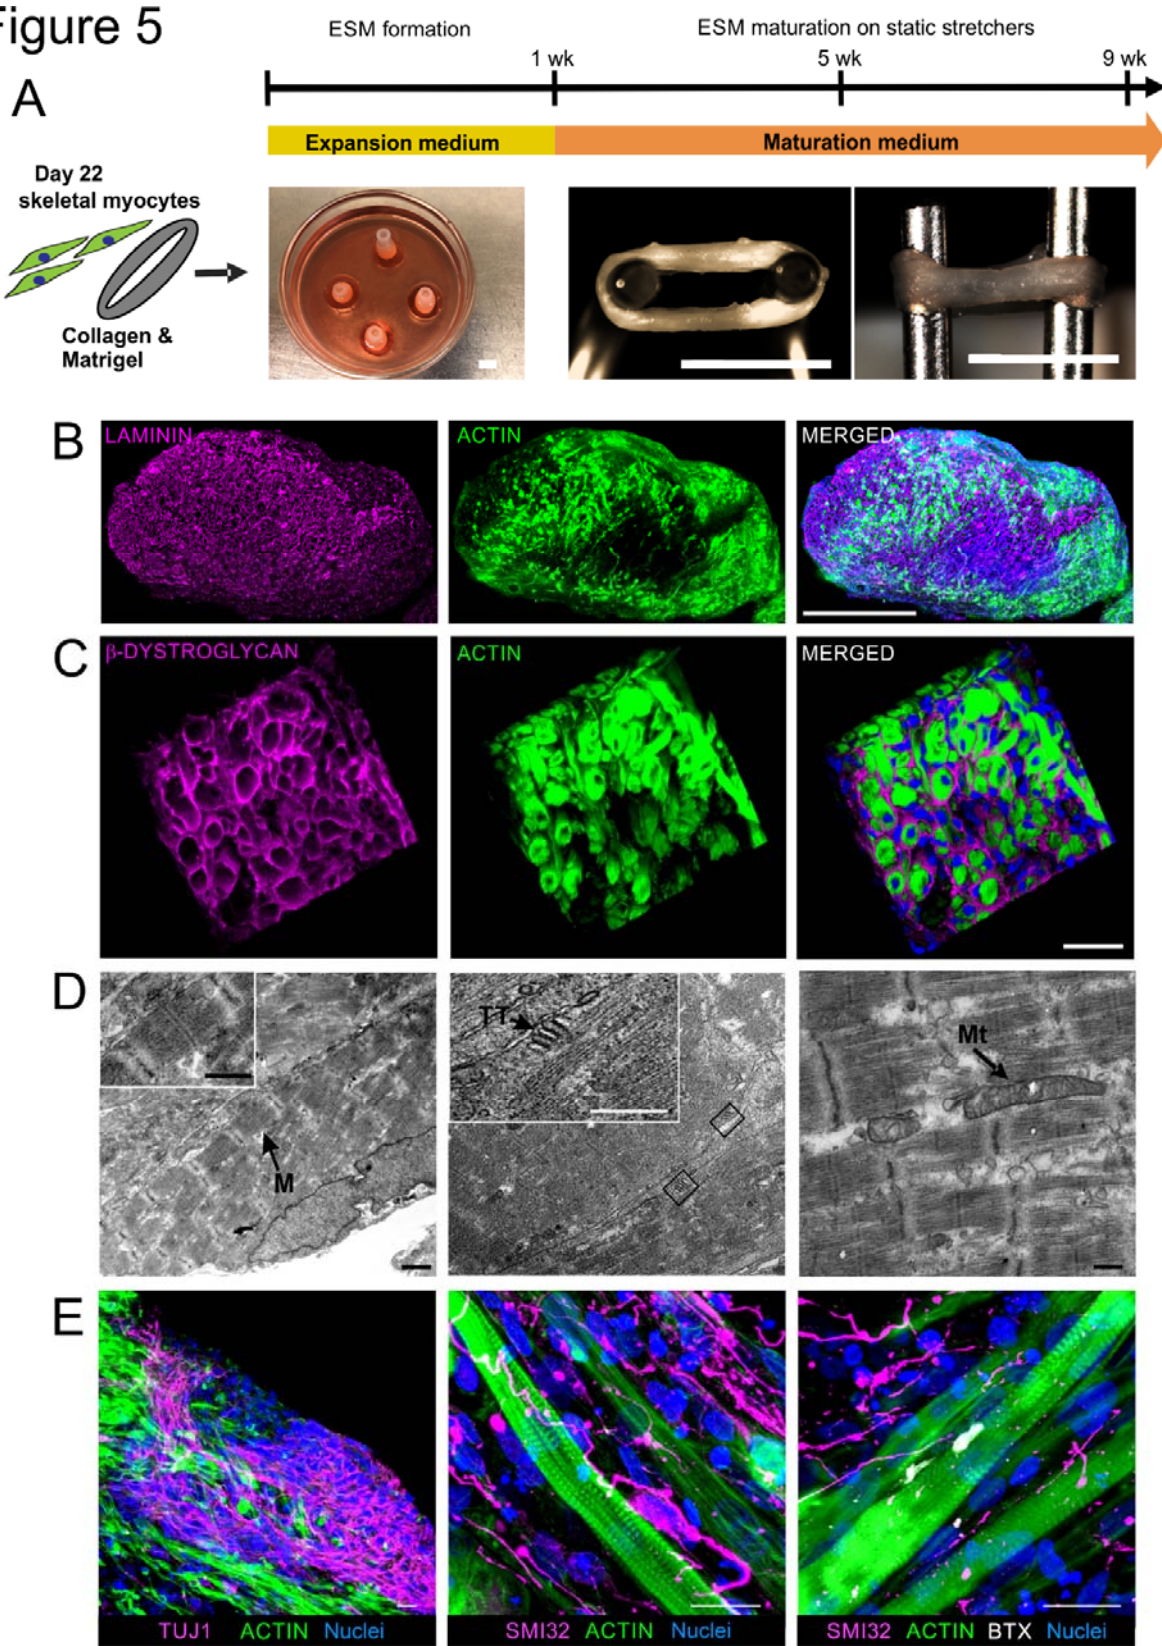

1092  
1093

1094

1095

1096 **Figure 5. Advanced development of skeletal muscle structures in human engineered**

1097 **skeletal muscle. (A)** Scheme of engineered skeletal muscle (ESM) generation from human

1098 PSC-derived skeletal myocytes with collagen type 1 and Matrigel™ in a ring-shaped

1099 hydrogel. ESM formation in expansion medium for 1 week in PDMS casting molds,

1100 functional maturation under isometric mechanical load (ESM on metal hooks of the static

1101 stretcher) for up to 9 wks. Scale bar: 5 mm. **(B)** Immunostaining of ACTIN+ muscle cells

1102 (green) and LAMININ+ extracellular matrix (magenta) in a representative cross section of 5

1103 weeks old ESM. Scale bar: 500 μm. **(C)** Immunostaining of β-DYSTROGLYCAN (magenta)

1104 in the sarcolemma of ACTIN+ muscle fibers (green) in an ESM cross section. Scale bar: 40

1105 μm. **(D)** Transmission electron microscopy (TEM) images of sarcomere ultrastructure, t-

1106 tubular triads and mitochondria along the muscle fibers in ESM. M: M-line, Mt:

1107 Mitochondria, TT: t-tubule. Scale bar: 1μm (left and middle panel) and 250 nm (right panel).

1108 **(E)** Immunostaining of ACTIN+ muscle cells (green) and TUJ1 or SMI32 positive neurons

1109 (magenta), Bungarotoxin+ (BTX, gray) motor end plates, and nuclei (blue) in 5 wks old ESM.

1110 Scale bars: 20 μm.

1111

1112

## Figure 6

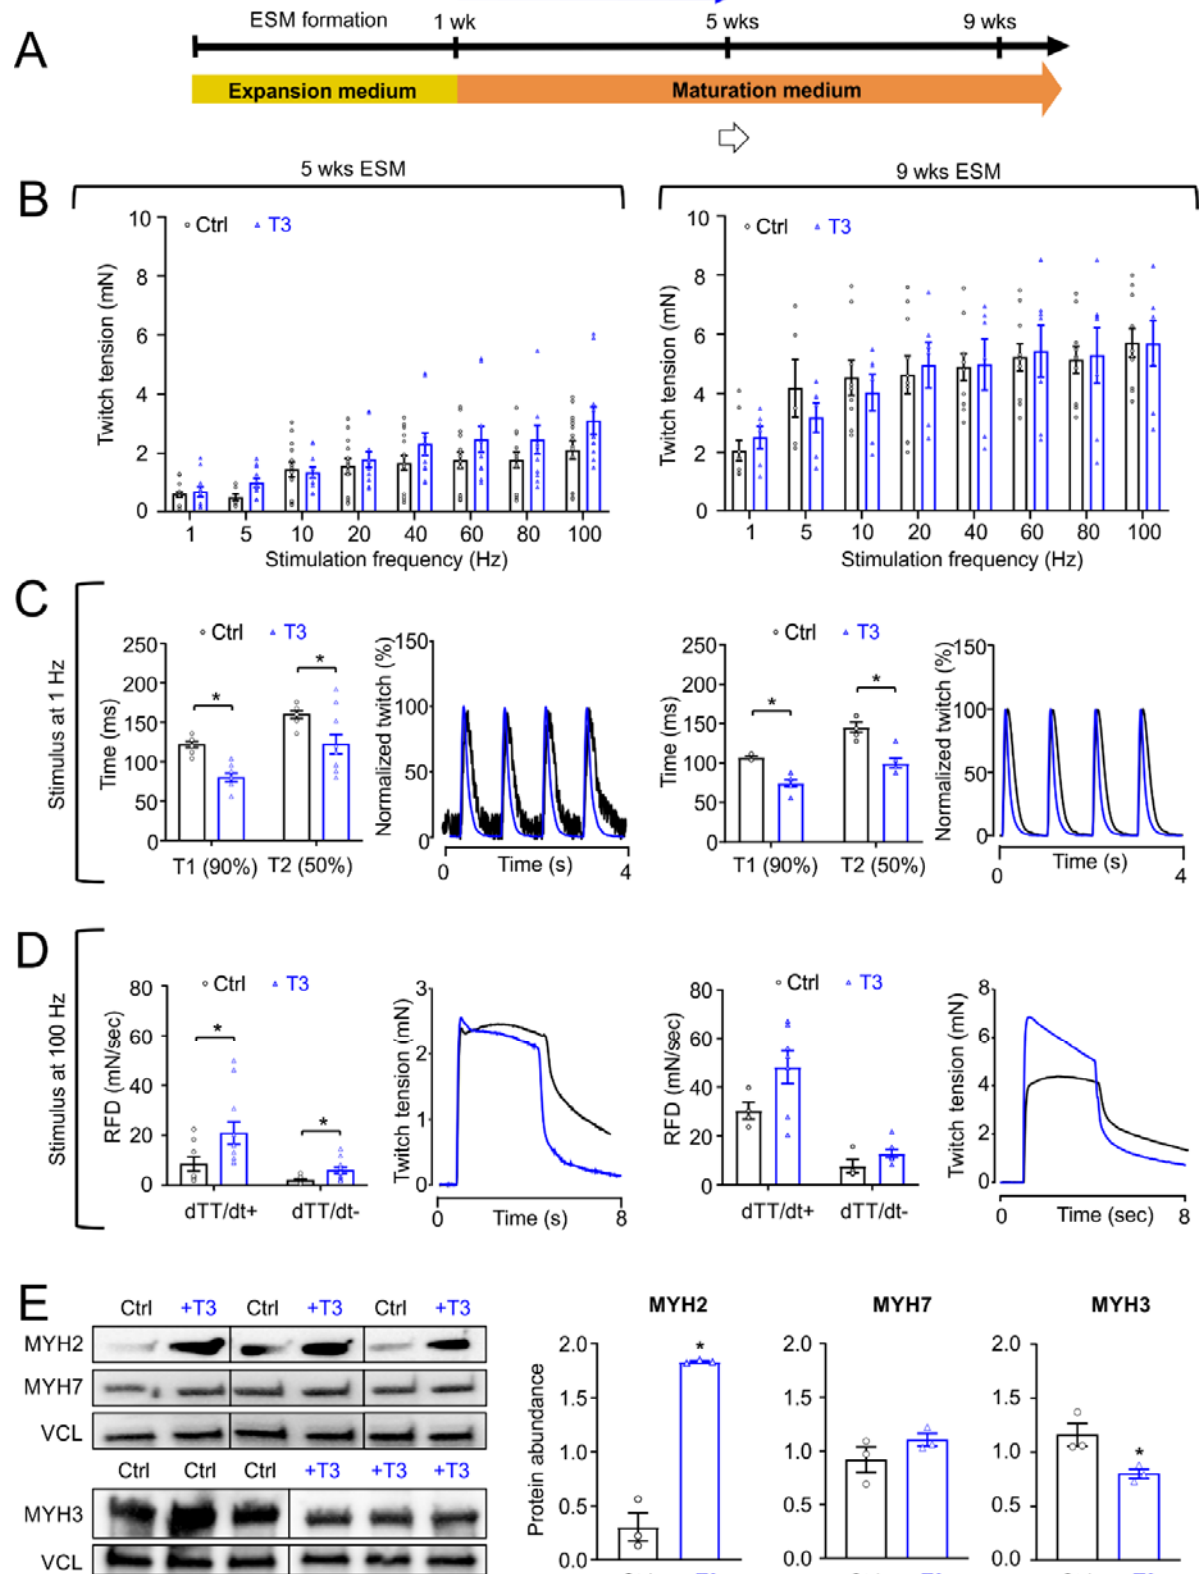

1113  
1114  
1115  
1116



1117 **Figure 6: Advancing ESM function by thyroid hormone treatment.** (A) Scheme of  
1118 experimental design of ESM maturation for 5 or 9 wks with or without additional application  
1119 of 0.1  $\mu\text{mol/L}$  triiodo-L-thyronine (T3) for 4 wks. (B) Twitch tension in response to  
1120 increasing stimulation frequencies of 5 wks and 9 wks old ESM cultured with (blue bars) or  
1121 without T3 (black bars);  $n = 11-16/\text{group}$  at 5 wks;  $7-10/\text{group}$  at 9 wks). (C) Quantification  
1122 of contraction (T1) and relaxation (T2) time of single twitches of 5 wks old control (black  
1123 bars) or +T3 (blue bars) ESM at 1 Hz (**first panel**); Normalized representative traces of  
1124 single twitches of 5 wks old control (black line) or +T3 (blue line) ESM at 1 Hz (**second**  
1125 **panel**); Quantification of contraction (T1) and relaxation (T2) time of single twitches of 9  
1126 wks old control (black bars) or +T3 (blue bars) ESM at 1 Hz (**third panel**); Normalized  
1127 representative traces of single twitches of 9 wks old control (black line) or +T3 (blue line)  
1128 ESM at 1 Hz (**fourth panel**);  $n = 5-11/\text{group}$ ,  $*p < 0.05$  by Student's t-test. (D) Rate of force  
1129 development (RFD; rate of contraction:  $dTT/dt+$  and rate of relaxation:  $dTT/dt-$ ) of 5 wks old  
1130 control (black bars) or +T3 (blue bars) ESM at 100 Hz tetanus (**first panel**); Representative  
1131 traces of twitch tension of 5 wks old control (black line) or +T3 (blue line) ESM at 100 Hz  
1132 tetanus (**second panel**); Rate of force development (RFD; rate of contraction:  $dTT/dt+$  and  
1133 rate of relaxation:  $dTT/dt-$ ) of 9 wks old control (black bars) or +T3 (blue bars) ESM at 100  
1134 Hz tetanus (**third panel**); Representative traces of twitch tension of 9 wks old control (black  
1135 line) or +T3 (blue line) ESM at 100 Hz tetanus (**fourth panel**);  $n = 4-11/\text{group}$ ,  $*p < 0.05$  by  
1136 Student's t-test. (E) Immunoblot for fast myosin heavy chain (MYH2), slow myosin heavy  
1137 chain (MYH7), embryonic myosin heavy chain (MYH3) and loading control vinculin (VCL).  
1138 Protein abundance of MYH2 (**left panel**), MYH7 (**middle panel**) and MYH3 (**right panel**)  
1139 in 9 wks old ESM cultured with (blue bars) or without T3 (black bars);  $n = 3/\text{group}$ ,  $*p < 0.05$   
1140 by Student's t-test.

## Figure 7

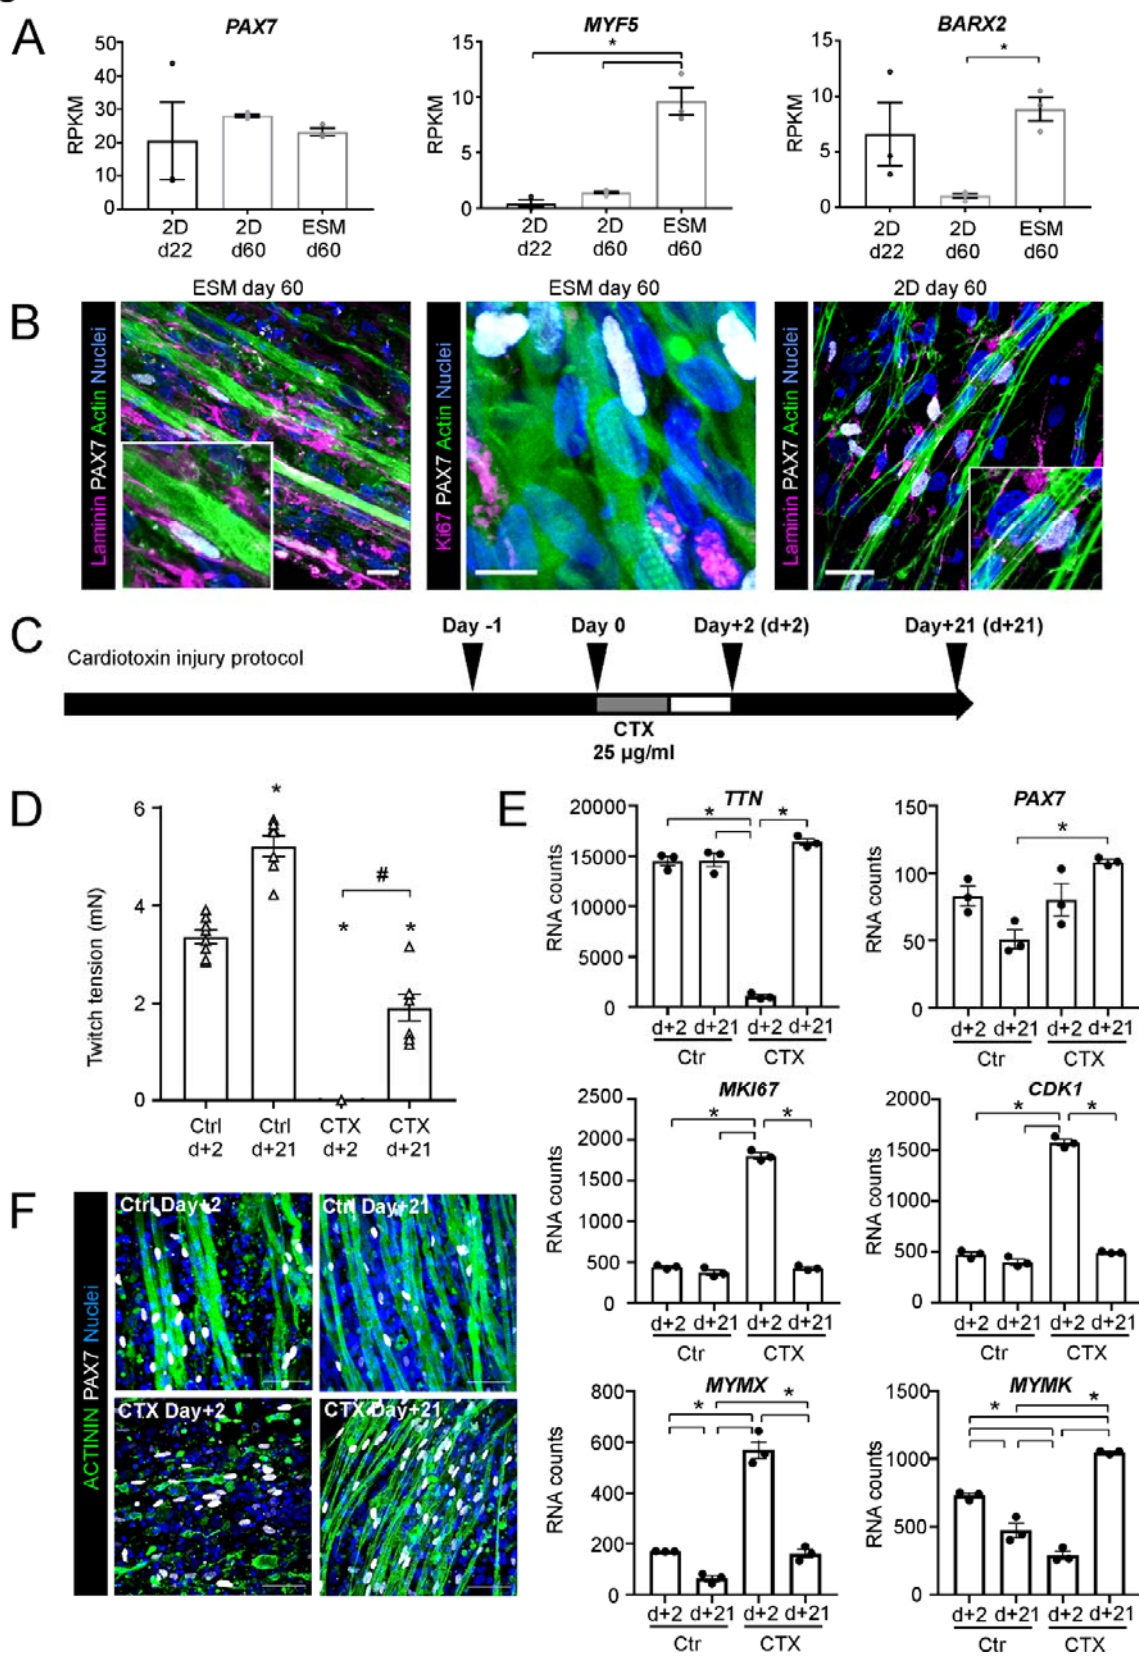

1141  
1142

1143 **Figure 7. Regenerative capacity of human engineered skeletal muscle.** (A) RNA transcript  
1144 (Reads per Kilobase Million, RPKM) of indicated muscle stem cell markers in 2D monolayer  
1145 cells at day 22 and day 60, plus day 60 ESM; n = 3-4/group, \*p<0.05 by 1-way ANOVA and  
1146 Tukey's multiple comparison test. (B) Immunostaining of longitudinal sections of day 60  
1147 ESM for LAMININ (magenta), KI67 (magenta), ACTIN (green), PAX7 (gray), and nuclei  
1148 (blue). Scale bars: 10  $\mu$ m. Immunostaining of LAMININ (magenta), PAX7 (gray), ACTIN  
1149 (green), and nuclei (blue) in 2D monolayer cultures at day 60. Scale bar: 50  $\mu$ m. (C)  
1150 Experimental design of cardiotoxin (CTX) injury model. ESM were incubated with 25  $\mu$ g/ml  
1151 CTX for 24 hrs. (D) Tetanic twitch tension at 100 Hz stimulation frequency of ESM at  
1152 indicated time points after CTX (25  $\mu$ g/ml) injury or control (Ctrl) condition; n=7-8/group,  
1153 \*p<0.05 vs. the respective Ctrl day +2, by 1-way ANOVA and Tukey's multiple comparison  
1154 test, ##\*p<0.05 CTX day +2 vs. CTX day +21. (E) RNA transcript for indicated genes at early  
1155 (d+2) and late (day+21) time points after CTX (25  $\mu$ g/ml) injury or control (Ctrl) conditions;  
1156 n=3, \*p<0.05 by 1-way ANOVA and Tukey's multiple comparison test. (F) Immunostaining  
1157 of sarcomeric  $\alpha$  -ACTININ (green), PAX7 (gray), and nuclei (blue) in ESM at indicated time  
1158 points. Scale bars: 50  $\mu$ m.

1159  
1160  
1161  
1162  
1163  
1164  
1165  
1166  
1167  
1168  
1169  
1170  
1171  
1172  
1173  
1174  
1175
